# Supplementary material
Source: PubMed Central journal article supplement (PMC4434482)
Supplement: ml5b00039_si_001.pdf [file ml5b00039_si_001.pdf]

# Supporting Information

## *N*-(3-ethynyl-2, 4-difluorophenyl)sulfonamide Derivatives as Selective Raf Inhibitors

Yingjun Li,<sup>†,‡</sup> Huimin Cheng,<sup>†</sup> Zhang Zhang,<sup>†,§</sup> Xiaoxi Zhuang,<sup>†</sup> Jinfeng Luo,<sup>†</sup>  
Huoyou Long,<sup>†</sup> Yang Zhou,<sup>†,‡</sup> Yong Xu,<sup>†</sup> Rana Taghipouran,<sup>⊥</sup> Dan Li,<sup>⊥</sup> Adam  
Patterson,<sup>⊥,ϕ</sup> Jeff Smaill,<sup>⊥,ϕ</sup> Zhengchao Tu,<sup>†</sup> Donghai Wu,<sup>†</sup> Xiaomei Ren,<sup>†,\*</sup> and Ke  
Ding<sup>†,\*</sup>

<sup>†</sup>State Key Laboratory of Respiratory Diseases, Guangzhou Institutes of Biomedicine and Health,  
Chinese Academy of Sciences, #190 Kaiyuan Avenue, Guangzhou 510530, China

<sup>‡</sup>University of Chinese Academy of Sciences, #19 Yuquan Road, Beijing 100049, China

<sup>§</sup>Biotechnological Institute of Chinese Materia Medica and Department of pharmacology, Jinan  
University, #601 Huangpu Avenue West, Guangzhou 510632, China.

<sup>⊥</sup> Auckland Cancer Society Research Centre, University of Auckland, #92019 Private Bag , Auckland  
1142, New Zealand

<sup>ϕ</sup>Maurice Wilkins Centre for Molecular Biodiscovery, University of Auckland, #92019 Private Bag,  
Auckland 1142, New Zealand

\* Tel: +86-20-32015276. Fax: +86-20-32015299. E-Mail: [ding\\_ke@gibh.ac.cn](mailto:ding_ke@gibh.ac.cn);  
[ren\\_xiaomei@gibh.ac.cn](mailto:ren_xiaomei@gibh.ac.cn)

**Contents:**

|                                                                                                                       |        |
|-----------------------------------------------------------------------------------------------------------------------|--------|
| Figure S1. Chemical structures of FDA approved B-Raf <sup>V600E</sup> inhibitor <b>2</b> .....                        | s3     |
| Abbreviations.....                                                                                                    | s3     |
| General methods for chemistry.....                                                                                    | s3     |
| Synthetic procedures and compound characterization.....                                                               | s2-14  |
| Scheme S1. Synthesis of compounds <b>14</b> .....                                                                     | s11    |
| Scheme S2. Synthesis of compounds <b>19</b> .....                                                                     | s12    |
| Computational study .....                                                                                             | s14    |
| Materials and methods for biological assays.....                                                                      | s15-19 |
| Table S1. Pharmacokinetic profile of selected compounds in Rats.....                                                  | s19    |
| Figure S2. Dose-response behaviour of BRAF <sub>Kd</sub> upon treatment with inhibitor <b>3s</b> .....                | s19    |
| Table S2. Matrix of compound screen for inhibitor <b>3s</b> .....                                                     | s19-30 |
| Table S3. TREEspot <sup>TM</sup> Interaction Maps for <b>3s</b> .....                                                 | s31    |
| Table S4. S-score Table for <b>3s</b> .....                                                                           | s31    |
| Figure S3. <b>3o</b> and <b>3s</b> dose-dependently inhibit the activation of MAPK pathway in colon cancer cells..... | s32    |
| Table S5. Enzymatic and Cellular Activities of Dabrafenib (IC <sub>50</sub> , μM/L) .....                             | s32    |
| Figure S6. <b>3s</b> do not affect the body weight of mice in xenograft model of Colo205.....                         | s33    |
| <sup>1</sup> H NMR and <sup>13</sup> C NMR spectra of compounds <b>3a-s</b> .....                                     | s34-51 |

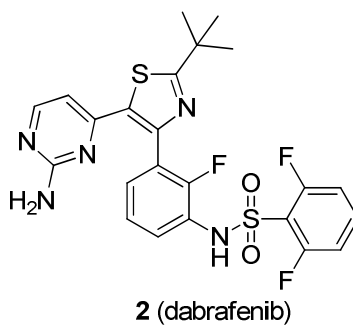

**Figure S1.** Chemical structure of FDA approved B-Raf<sup>V600E</sup> inhibitor **2**.

### Abbreviations

MAPK, mitogen-activated protein kinase signaling pathway; ERK, extracellular signal-regulated kinase; Val (V), valine; Glu (E), glutamic acid; FDA, Food and Drug Administration; DGF: Asp-Phe-Gly; rt, room temperature; IC<sub>50</sub>, the half maximal (50%) inhibitory concentration (IC) of a substance; DCM, dichloromethane; THF, tetrahydrofuran; MTT, 3-(4,5-dimethylthiazol-2-yl)-2,5-diphenyltetrazolium bromide; SD, standard deviation; PK, pharmacokinetic ; TGI, tumor growth inhibition.

**General Methods for Chemistry.** All reagents and solvents were used directly as purchased from commercial sources. Flash chromatography was performed using silica gel (200-300 mesh). All reactions were monitored by TLC, using silica gel plates with fluorescence F<sub>254</sub> and UV light visualization. <sup>1</sup>H NMR and <sup>13</sup>C NMR spectra were recorded on a Bruker AV-400 spectrometer at 400 MHz and Bruker AV-500 spectrometer at 125 MHz. Coupling constants (*J*) are expressed in hertz (Hz). Chemical shifts ( $\delta$ ) of NMR are reported in parts per million (ppm) units relative to an internal control (TMS). Low resolution ESI-MS were recorded on an Agilent 1200 HPLC-MSD mass spectrometer and high resolution ESI-MS on an Applied Biosystems Q-STAR Elite ESI-LC-MS/MS mass spectrometer. The purity of compounds was determined by reverse-phase high performance liquid chromatography (HPLC) analysis to be >95%. HPLC instrument, Dionex Summit HPLC (column: Diamonsil C18, 5.0  $\mu$ M, 4.6  $\times$  250 mm (Dikma Technologies); detector, PDA-100 photodiode array; injector, ASI-100 autoinjector; pump, p-680A). A flow rate of 1.0 ml/min was used with a mobile phase of MeOH in H<sub>2</sub>O with a 0.1% modifier (ammonia or trifluoroacetate, v/v).

**2-bromo-1,3-difluoro-4-nitrobenzene 5.** To a 500 ml three-neck flask containing **4** (50g, 259 mmol) was added 250 ml concentrated sulfuric acid under iced base. Potassium nitrate (75g, 518 mmol, 2 eq) was added in small portions during 30min. After that the reaction mixture was warmed to rt and stirred overnight. The mixture was poured into 1L cooled water with stirring for 2h. The precipitated light yellow solid was filtered, washed with 50 ml water three times and dried under reduced pressure. The desired product compound (55g, 231 mmol) was dissolved in 50 ml EtOH in a 500 ml three-neck flask with reflux condenser. 200 ml concentrated hydrochloric acid was added then SnCl<sub>2</sub> (131g, 693 mmol, 3 eq) was added in small portions and the mixture was heated to reflux for 3h. Another 1 eq SnCl<sub>2</sub> (43g) was added and the reaction was refluxed for 2h. After the completion of the reaction, the mixture was taken up in 1L ice-water mixture and adjusted the pH value to 8 with NaOH aqueous solution. The resulting solid was filtered and washed well with EtOAc. The aqueous layer was extracted with EtOAc 3 times. The combined EtOAc layers were dried over Na<sub>2</sub>SO<sub>4</sub>, filtered and concentrated under reduced pressure to afford a brown crystal solid. Yield 43.5g (93%). <sup>1</sup>H NMR (400 MHz, CDCl<sub>3</sub>) δ 6.77(m, 1H), 6.67(m, 1H), 3.61-3.82(brs, 1H)

**2,4-difluoro-3-methylaniline 6.** A mixture of **5** (5g, 24 mmol), Cu( I ) iodide (0.456g, 2.4 mmol, 0.1 eq), Pd(dba)<sub>2</sub> (690mg, 1.2 mmol, 0.05 eq), K<sub>2</sub>CO<sub>3</sub> (6.6g, 48 mmol, 2 eq), and THF (50 ml) were added to a 150 ml sealed tube. The mixture was bubbled with argon for 20 min. Trimethylsilylacetylene (10 ml, 72 mmol, 3 eq) and 10% Tri-tert-butylphosphine solution in toluene (4.8 ml, 2.4 mmol, 0.1 eq) was added and the sealed reaction mixture was stirred at 120°C for 48h. After the reaction was finished, the mixture was filtered through celite and concentrated. The residue was dissolved in THF (30 ml) with addition of tetrabutylammonium fluoride (1g). The reaction mixture was stirred at rt for 1h and then extracted with EtOAc, washed with brine and dried on Na<sub>2</sub>SO<sub>4</sub>. The crude product was purified through flash column chromatography, eluting with petroleum ether/ EtOAc (30:1), petroleum ether/ EtOAc (10:1) to give the desired product(1.7g, yield: 46%). <sup>1</sup>H NMR (400 MHz, CDCl<sub>3</sub>) δ 6.74(m, 2H), 3.49(s, 1H), 3.49-3.91(brs, 2H).

**3-((1H-pyrazolo[3,4-b]pyridin-5-yl)ethynyl)-2,4-difluoroaniline 7.** A mixture of **6** (1.7g, 11 mmol), 6-bromo-3H-pyrazolo[3,4-b]pyridine (2.18g, 11 mmol, 1 eq), Cu( I ) iodide (0.209g, 1.1 mmol, 0.1 eq), Pd(dba)<sub>2</sub> (322mg, 0.56 mmol, 0.05 eq), K<sub>2</sub>CO<sub>3</sub> (3g, 22 mmol, 2

eq), and dry THF (30 ml) were added to a 100 ml sealed tube. The mixture was bubbled with argon for 20 min. 10% Tri-tert-butylphosphine solution in toluene (2.2 ml, 1.1 mmol, 0.1 eq) was added and the sealed reaction mixture was stirred at 120°C for 24h. After the reaction was finished, the mixture was filtered through celite and concentrated. The residue was purified through flash column chromatography, eluting with petroleum ether/ EtOAc (2:1) to give the desired product as a brown solid (2.1g, yield: 63%). <sup>1</sup>H NMR (400 MHz, DMSO-d<sub>6</sub>) δ 13.96(s, 1H), 8.67(s, 1H), 8.51(d, *J* = 1.7 Hz, 1H), 8.21(s, 1H), 6.94(t, *J* = 9 Hz, 1H), 6.81-6.87(m, 1H), 5.10-5.35(brs, 2H).

**N-(3-((1H-pyrazolo[3,4-b]pyridin-5-yl)ethynyl)-2,4-difluorophenyl)benzenesulfonamide 3a.** benzenesulfonyl chloride(194mg, 1.1 mmol, 1.1 eq) was added dropwise to a solution of **7** (270mg, 1 mmol) in dry DCM (10 ml), following by addition of pyridine (0.12 ml, 1.5mmol, 1.5 eq). The reaction mixture was stirred at rt overnight. After the reaction was finished, 1 ml MeOH was added to the resulting suspension and the mixture was stirred for 10min and then concentrated. The residue was purified through flash column chromatography, eluting with DCM/ MeOH (100:1), DCM/ MeOH (40:1). The obtained solid was recrystallized with DCM to give the desired product (0.369mg, yield: 90%). <sup>1</sup>H NMR(400 MHz, DMSO-d<sub>6</sub>): δ 13.97 (s, 1H), 10.35 (s, 1H), 8.65 (d,*J* = 2Hz, 1H), 8.51 (d,*J* = 2Hz, 1H), 8.21 (s, 1H), 7.71-7.74 (m, 2H), 7.66-7.69(m, 1H), 7.57-7.61 (m, 2H), 7.25-7.31 (m, 1H), 7.19-7.24 (m, 1H),

**N-(3-ethynyl-2,4-difluorophenyl)pyridine-3-sulfonamide 8.** 3-pyridine sulphonyl chloride (2.15g, 12.1 mmol, 1.1 eq) was added dropwise to a solution of **6** (1.7g, 11 mmol) in dry DCM (55 ml), following by addition of pyridine (1.35 ml, 16.5mmol, 1.5 eq). The reaction mixture was stirred at rt overnight. After the reaction was finished, 20 ml hexane was added and the precipitation was filtered and collected. The filtrate was concentrated and purified through flash column chromatography, eluting with DCM/ MeOH (100:1), DCM/ MeOH (40:1). Combined the solid to give the desired product (3g, yield: 93%).<sup>1</sup>H NMR (400 MHz, CDCl<sub>3</sub>) δ10.51-10.72(brs, 1H) 8.83(m, 2H), 8.08(d, *J* = 8.4 Hz, 1H), 8.63(m, 1H), 7.30(m, 1H), 7.21(m, 1H), 4.82(s, 1H),

**N-(3-((3H-pyrrolo[2,3-b]pyridin-6-yl)ethynyl)-2,4-difluorophenyl)pyridine-3-sulfonamide 3f.** A mixture of **8** (294, 1 mmol), 5-bromo-1H-pyrrolo[2,3-b]pyridine (197mg, 1 mmol, 1

eq), Cu(I) iodide (19mg, 0.1 mmol, 0.1 eq), Pd(dba)<sub>2</sub> (29mg, 0.05 mmol, 0.05 eq), K<sub>2</sub>CO<sub>3</sub> (276mg, 2 mmol, 2 eq), and dry THF (5 ml) were added to a 10 ml sealed tube. The tube was evacuated and backfilled with argon three times. 10% Tri-tert-butylphosphine solution in toluene (2.2 ml, 1.1 mmol, 0.1 eq) was added and the sealed reaction mixture was stirred at 120°C for 24h. After the reaction was finished, the mixture was filtered through celite and washed with THF repeatedly. Water was added to the filtrate and the pH was adjusted to 6 with 1N HCl. The resulting suspension was extracted with EtOAc three times. The combined organic layers were dried, filtered and concentrated. The residue was purified through flash column chromatography, eluting with DCM/ MeOH (100:1), DCM/ MeOH (40:1). The obtained solid was recrystallized with DCM to give the desired product (260mg, yield: 64%).  
<sup>1</sup>H NMR (400 MHz, CDCl<sub>3</sub>) δ 12.00 (s, 1H), 10.60 (s, 1H), 8.86-8.88 (m, 2H), 8.37 (s, 1H), 8.19 (d, J = 1.6Hz, 1H), 8.12 (d, J = 8.1Hz, 1H), 7.66 (dd, J = 4.8, 8.0Hz, 1H), 7.57-7.59 (m, 1H), 7.27-7.33 (m, 1H), 7.20-7.25 (m, 1H), 6.52 (dd, J = 1.8, 3.3Hz, 1H).

**N-(3-((1H-pyrazolo[3,4-b]pyridin-5-yl)ethynyl)-2,4-difluorophenyl)benzenesulfonamide**

**3a**

<sup>1</sup>H NMR(400 MHz, DMSO-d<sub>6</sub>): δ(ppm) 13.97 (s, 1H), 10.35 (s, 1H), 8.65 (d, J = 2Hz, 1H), 8.51 (d, J = 2Hz, 1H), 8.21 (s, 1H), 7.71-7.74 (m, 2H), 7.66-7.69(m, 1H), 7.57-7.61 (m, 2H), 7.25-7.31 (m, 1H), 7.19-7.24 (m, 1H). <sup>13</sup>C NMR (125 MHz, DMSO-d<sub>6</sub>): δ(ppm) 160.99(dd, J = 250,4 Hz, 1C), 157.48(dd, J = 253,5 Hz, 1C), 151.29, 151.08, 140.02, 134.41, 134.06, 133.56, 129.74(2C), 128.88(d, J = 10 Hz, 1C), 126.98(2C), 121.75(dd, J = 12,4 Hz, 1C), 114.36, 112.36(dd, J = 21,4 Hz, 1C), 111.06, 101.89(t, J = 20 Hz, 1C), 97.87, 76.71. HRMS (ESI) calcd for C<sub>20</sub>H<sub>12</sub>F<sub>2</sub>N<sub>4</sub>O<sub>2</sub>S [M+H]<sup>+</sup>: 411.072; found 411.0722. HPLC purity = 98.19%, Rt 2.40 min.

**N-(3-((1H-pyrazolo[3,4-b]pyridin-5-yl)ethynyl)-2,4-difluorophenyl)-2-fluorobenzenesulfonamide 3b**

<sup>1</sup>H NMR(400 MHz, DMSO-d<sub>6</sub>): δ(ppm) 13.98(s, 1H), 10.64(s, 1H), 8.66(s, 1H), 8.52(s, 1H), 8.22(s, 1H), 7.74(t, J = 7.1 Hz, 2H), 7.49(t, J = 9.5 Hz, 1H), 7.33-7.38(m, 2H), 7.23(t, J = 8.8 Hz, 1H). <sup>13</sup>C NMR (100 MHz, DMSO-d<sub>6</sub>): δ(ppm) 161.66(dd, J = 250,4 Hz, 1C), 160.08(d, J = 253 Hz, 1C), 158.32(dd, J = 253,6 Hz, 1C), 151.31, 136.40(d, J = 8 Hz, 1C), 134.39, 133.95, 130.28, 129.58(d, J = 10 Hz, 1C), 128.38(d, J = 14 Hz, 1C), 125.33(d, J = 36 Hz, 1C),

121.42(dd, J = 13,3 Hz, 1C), 117.87, 117.66, 114.46, 112.31(dd, J = 21,4 Hz, 1C), 111.25, 102.09(t, J = 19 Hz, 1C), 98.05, 76.77. HRMS (ESI) calcd for C<sub>20</sub>H<sub>11</sub>F<sub>3</sub>N<sub>4</sub>O<sub>2</sub>S [M+H]<sup>+</sup>: 429.0628; found 429.0629. HPLC purity = 99.33%, Rt 2.01 min.

**N-(3-((1H-pyrazolo[3,4-b]pyridin-5-yl)ethynyl)-2,4-difluorophenyl)-3-fluorobenzenesulfonamide 3c**

<sup>1</sup>H NMR(400 MHz, DMSO-d<sub>6</sub>): δ(ppm) 13.99(1s), 10.51(1s), 8.66(1s), 8.52(1s), 8.21(1s), 7.66(dd, J = 14.1,8.0 Hz, 1H), 7.54-7.58(m, 3H), 7.28(dd, J = 15.0,8.7 Hz, 1H), 7.23(t, J = 8.8 Hz, 1H). <sup>13</sup>C NMR (125 MHz, DMSO-d<sub>6</sub>): δ(ppm): 163.05(d, J = 247 Hz, 1C), 161.19(dd, J = 250,4 Hz, 1C), 157.67(dd, J = 253,5 Hz, 1C), 151.30, 151.08, 142.10(d, J = 6 Hz, 1C), 134.43, 134.10, 132.26(d, J = 8 Hz, 1C), 129.18(d, J = 10 Hz, 1C), 123.34(d, J = 3 Hz, 1C), 121.39(dd, J = 12,4 Hz, 1C), 120.88(d, J = 41 Hz, 1C), 114.36, 114.09(d, J = 24 Hz, 1C), 112.49(dd, J = 42,4 Hz, 1C), 111.04, 101.98(t, J = 20 Hz, 1C), 97.95, 76.65. HRMS (ESI) calcd for C<sub>20</sub>H<sub>11</sub>F<sub>3</sub>N<sub>4</sub>O<sub>2</sub>S [M+H]<sup>+</sup>: 429.0628; found 429.0627. HPLC purity = 98.10%, Rt 2.09 min.

**N-(3-((1H-pyrazolo[3,4-b]pyridin-5-yl)ethynyl)-2,4-difluorophenyl)-4-fluorobenzenesulfonamide 3d**

<sup>1</sup>H NMR(400 MHz, DMSO-d<sub>6</sub>): δ(ppm) 13.98(1s), 10.38(1s), 8.66(1s), 8.52(1s), 8.22(1s), 7.79(t, J = 6.4 Hz, 2H), 7.44(t, J = 8.6 Hz, 2H), 7.29(dd, J = 15.2,8.5 Hz, 1H), 7.22(t, J = 8.8 Hz, 1H). <sup>13</sup>C NMR (125 MHz, DMSO-d<sub>6</sub>): δ(ppm): 165.88(d, J = 250 Hz, 1C), 161.14(dd, J = 250,4 Hz, 1C), 157.65(dd, J = 253,5 Hz, 1C), 151.29, 151.07, 136.37(d, J = 3 Hz, 1C), 134.41, 134.04, 130.18(d, J = 10 Hz, 2C), 129.16(d, J = 10 Hz, 1C), 121.52(dd, J = 12,3 Hz, 1C), 117.05(d, J = 22 Hz, 2C), 114.36, 112.43(dd, J = 22,3 Hz, 1C), 111.05, 101.98(t, J = 20 Hz, 1C), 97.92, 76.67. HRMS (ESI) calcd for C<sub>20</sub>H<sub>11</sub>F<sub>3</sub>N<sub>4</sub>O<sub>2</sub>S [M+H]<sup>+</sup>: 429.0628; found 429.0630. HPLC purity = 99.48%, Rt 2.26 min.

**N-(3-((1H-pyrazolo[3,4-b]pyridin-5-yl)ethynyl)-2,4-difluorophenyl)pyridine-2-sulfonamide 3e**

<sup>1</sup>H NMR(400 MHz, DMSO-d<sub>6</sub>): δ(ppm) 13.99(1s), 10.56(1s), 8.77(d, J = 4.3 Hz, 1H), 8.67(1s), 8.53(1s), 8.22(1s), 8.09(t, J = 7.8 Hz, 1H), 7.92(d, J = 7.8 Hz, 1H), 7.70(t, J = 6.1 Hz, 1H), 7.38(dd, J = 15.0,8.7 Hz, 1H), 7.21(t, J = 8.8 Hz, 1H). <sup>13</sup>C NMR (125 MHz, DMSO-d<sub>6</sub>): δ(ppm) 165.78(dd, J = 250,4 Hz, 1C), 162.41(dd, J = 253,5 Hz, 1C), 162.00, 156.09, 155.85, 155.38, 144.05, 139.26(d, J = 16 Hz, 1C), 138.90(d, J = 15 Hz, 1C), 133.93, 132.73, 127.17,

126.67(dd, J = 12,3 Hz, 1C),119.14, 16.97(d,J = 10 Hz, 1C),115.87, 106.58(t,J = 20 Hz, 1C),102.57, 81.55. HRMS (ESI) calcd for C<sub>19</sub>H<sub>11</sub>F<sub>2</sub>N<sub>5</sub>O<sub>2</sub>S [M+H]<sup>+</sup>: 412.0674; found 412.0672. HPLC purity = 99.18%, Rt 1.91 min.

**N-(3-((3H-pyrazolo[3,4-b]pyridin-6-yl)ethynyl)-2,4-difluorophenyl)pyridine-3-sulfonamide 3f**

<sup>1</sup>H NMR(400 MHz, DMSO-d<sub>6</sub>): δ(ppm) 13.97(s, 1H), 10.62(bris, 1H), 8.88(d,J = 2.1 Hz, 1H), 8.85(dd, J = 4.8,1.4 Hz, 1H), 8.65(d,J = 2.0 Hz, 1H), 8.51(d,J = 1.9 Hz, 1H), 8.21(s, 1H), 8.11(td, J = 8.3,1.9 Hz, 1H), 7.65(dd, J = 8.0,4.8 Hz, 1H), 7.29-7.35(m, 1H), 7.24(t, J = 8.9 Hz, 1H). <sup>13</sup>C NMR (125 MHz, DMSO-d<sub>6</sub>): δ(ppm) 161.31, (dd, J = 250,4 Hz, 1C), 157.73 (dd, J = 253,5 Hz, 1C), 154.09, 151.29, 151.08, 147.39, 136.58, 135.07, 134.41, 134.08, 129.52(d,J = 10 Hz, 1C), 124.79, 121.22(dd, J = 13,3 Hz, 1C), 114.35, 112.57(dd, J = 22,4 Hz, 1C), 111.03, 102.05(t,J = 20 Hz, 1C), 97.99, 76.61. HRMS (ESI) calcd for C<sub>19</sub>H<sub>11</sub>F<sub>2</sub>N<sub>5</sub>O<sub>2</sub>S [M+H]<sup>+</sup>: 412.0674; found 412.0674. HPLC purity = 98.39%, Rt 10.61 min.

**N-(3-((3H-pyrrolo[2,3-b]pyridin-6-yl)ethynyl)-2,4-difluorophenyl)pyridine-3-sulfonamide 3g**

<sup>1</sup>H NMR(400 MHz, DMSO-d<sub>6</sub>): δ(ppm) 12.00 (s, 1H), 10.60 (s, 1H), 8.86-8.88 (m, 2H), 8.37 (s, 1H), 8.19 (d,J = 1.6Hz, 1H), 8.12 (d,J = 8.1Hz, 1H), 7.66 (dd, J = 4.8, 8.0Hz, 1H), 7.57-7.59 (m, 1H), 7.27-7.33 (m, 1H), 7.20-7.25 (m, 1H), 6.52 (dd, J = 1.8, 3.3Hz, 1H). <sup>13</sup>C NMR (125 MHz, DMSO-d<sub>6</sub>): δ(ppm) 161.30(dd, J = 250,4 Hz, 1C), 157.69(dd, J = 253,6 Hz, 1C), 154.12, 148.29, 147.41, 145.50, 136.64, 135.08, 131.74, 129.18(d,J = 10 Hz, 1C), 128.32, 124.91, 121.06(dd, J = 12,3 Hz, 1C), 119.63, 112.53(dd, J = 22,4 Hz, 1C), 109.65, 102.63, 102.31(t,J = 20 Hz, 1C), 99.40, 75.75. HRMS (ESI) calcd for C<sub>20</sub>H<sub>12</sub>F<sub>2</sub>N<sub>4</sub>O<sub>2</sub>S [M+H]<sup>+</sup>: 411.0722; found 411.0722. HPLC purity = 97.10%, Rt 1.86 min.

**N-(3-((1H-indazol-5-yl)ethynyl)-2,4-difluorophenyl)pyridine-3-sulfonamide 3h**

<sup>1</sup>H NMR(400 MHz, DMSO-d<sub>6</sub>): δ(ppm) 11.38(s, 1H), 8.86(d,J = 1.5 Hz, 1H), 8.76(d,J = 3.8 Hz, 1H), 8.08(td, J = 8.1,1.8 Hz, 1H), 7.78(s, 1H), 7.58(dd, J = 7.9,4.9 Hz, 1H), 7.43-7.46(m, 2H), 7.20-7.26(m, 2H), 7.08(t, J = 8.9 Hz, 1H), 6.49(s, 1H). <sup>13</sup>C NMR (125 MHz, DMSO-d<sub>6</sub>): δ(ppm) 161.30(dd, J = 250,4 Hz, 1C), 157.72 (dd, J = 252,6 Hz, 1C),154.07, 147.41, 140.06, 136.74, 135.05, 134.67, 129.23, 129.06(d,J = 10 Hz, 1C), 125.57, 124.91, 123.28, 121.15 (dd, J = 13,4 Hz, 1C),113.05, 112.48(dd, J = 21, 3 Hz, 1C), 111.39, 102.50(t,J = 20 Hz, 1C),



101.15, 74.00. HRMS (ESI) calcd for C<sub>20</sub>H<sub>12</sub>F<sub>2</sub>N<sub>4</sub>O<sub>2</sub>S [M+H]<sup>+</sup>: 411.0722; found 411.0721.  
HPLC purity = 95.37%, Rt 6.60 min.

**N-(2,4-difluoro-3-(pyrazolo[1,5-a]pyrimidin-6-ylethynyl)phenyl)pyridine-3-sulfonamide**

**3i** <sup>1</sup>H NMR(400 MHz, DMSO-d<sub>6</sub>): δ(ppm) 10.64 (s, 1H), 9.58 (d, J = 1.2Hz, 1H), 8.88 (m, 2H), 8.62 (d, J = 2.0Hz, 1H), 8.34 (d, J = 2.3Hz, 1H), 8.12 (d, J = 8.0Hz, 1H), 7.66 (dd, J = 4.6, 7.9Hz, 1H), 7.33-7.39 (m, 1H), 7.24-7.28 (m, 1H), 6.84 (d, J = 1.6Hz, 1H). <sup>13</sup>C NMR (125 MHz, DMSO-d<sub>6</sub>): δ(ppm) 161.42(dd, J = 252,4 Hz, 1C), 157.74(dd, J = 542,5 Hz, 1C), 154.06, 150.90, 147.28, 147.11, 146.98, 139.11, 136.74, 135.09, 130.10(d, J = 10 Hz, 1C), 125.12, 121.00(dd, J = 12,3 Hz, 1C), 112.65(dd, J = 22,4 Hz, 1C), 104.00, 101.50(t, J = 20 Hz, 1C), 97.97, 93.50, 79.01. HRMS (ESI) calcd for C<sub>19</sub>H<sub>11</sub>F<sub>2</sub>N<sub>5</sub>O<sub>2</sub>S [M+H]<sup>+</sup>: 412.0674; found 412.0674. HPLC purity = 96.22%, Rt 6.69 min.

**N-(2,4-difluoro-3-((3-methoxy-1H-pyrazolo[3,4-b]pyridin-5-yl)ethynyl)phenyl)pyridine-3-sulfonamide 3j**

<sup>1</sup>H NMR(400 MHz, DMSO-d<sub>6</sub>): δ(ppm) 12.96 (s, 1H), 10.62 (s, 1H), 8.85-8.86 (m, 2H), 8.60 (d, J = 1.8Hz, 1H), 8.32(d, J = 1.6Hz, 1H), 8.09(d, J = 8.1Hz, 1H), 7.65 (dd, J = 4.8, 8.0 Hz, 1H), 7.30-7.32 (m, 1H), 7.22-7.26 (m, 1H), 4.02 (s, 3H). <sup>13</sup>C NMR (125 MHz, DMSO-d<sub>6</sub>): δ(ppm) 161.31 (d, J = 251 Hz, 1C), 157.70 (dd, J = 253,5 Hz, 1C), 155.38, 154.11, 152.40, 151.38, 136.53, 135.07, 132.74, 129.48 (d, J = 4 Hz, 1C), 124.81, 121.07(d, J = 13 Hz, 1C), 112.54 (d, J = 21 Hz, 1C), 109.75, 103.49, 102.12 (t, J = 20 Hz, 1C), 97.97, 76.51, 56.22. HRMS (ESI) calcd for C<sub>20</sub>H<sub>13</sub>F<sub>2</sub>N<sub>5</sub>O<sub>3</sub>S [M+H]<sup>+</sup>: 442.0780; found 442.0779. HPLC purity = 97.56%, Rt 3.90 min.

**N-(3-((1-ethoxy-3H-pyrazolo[3,4-b]pyridin-6-yl)ethynyl)-2,4-difluorophenyl)pyridine-3-sulfonamide 3k**

<sup>1</sup>H NMR(400 MHz, DMSO-d<sub>6</sub>): δ(ppm) 12.91(s, 1H), 10.61(s, 1H), 8.92(m, 2H), 8.60(s, 1H), 8.30(m, 1H), 8.12(d, J = 7.6 Hz, 1H), 7.67(s, 1H), 7.30(m, 1H), 7.23(m, 1H), 4.41(q, J = 7.4 Hz, 2H), 1.40(t, J = 7.4 Hz, 3H). <sup>13</sup>C NMR (125 MHz, DMSO-d<sub>6</sub>): δ(ppm) 161.30(d, J = 250 Hz, 1C), 157.69(d, J = 255 Hz, 1C), 154.79, 154.10, 152.32, 151.23, 147.41, 135.01, 132.76, 129.47(d, J = 11 Hz, 1C), 125.18, 121.14(d, J = 11 Hz, 1C), 112.56(dd, J = 21,3 Hz, 1C), 109.72, 103.72, 102.13(t, J = 20 Hz, 1C), 97.98, 76.51, 64.79, 14.97. HRMS (ESI) calcd for C<sub>21</sub>H<sub>15</sub>F<sub>2</sub>N<sub>5</sub>O<sub>3</sub>S [M+H]<sup>+</sup>: 456.0936; found 456.0940. HPLC purity = 96.02%, Rt 4.99 min.

**N-(2,4-difluoro-3-((1-methyl-3H-pyrazolo[3,4-b]pyridin-6-yl)ethynyl)phenyl)pyridine-3-sulfonamide 3l**

<sup>1</sup>H NMR(400 MHz, DMSO-d<sub>6</sub>): δ(ppm) 13.53 (s, 1H), 10.61 (s, 1H), 8.87 (d, J = 1.9 Hz, 1H), 8.85 (m, 1H), 8.60 (d, J = 1.8 Hz, 1H), 8.51 (d, J = 1.2 Hz, 1H), 8.11 (d, J = 8.1 Hz, 1H), 7.65 (dd, J = 4.8, 8.0 Hz, 1H), 7.29-7.35 (m, 1H), 7.22-7.26 (m, 1H), 2.51 (s, 3H). <sup>13</sup>C NMR (125 MHz, DMSO-d<sub>6</sub>): δ(ppm) 161.34(dd, J = 251,4 Hz, 1C), 157.72(dd, J = 254,6 Hz, 1C), 154.13, 151.75, 151.17, 147.39, 142.50, 136.55, 135.08, 133.67, 129.50(d, J = 9 Hz, 1C), 124.82, 121.13(dd, J = 12,4 Hz, 1C), 113.97, 112.60(dd, J = 21,4 Hz, 1C), 110.08, 102.14(t, J = 20 Hz, 1C), 98.25, 76.43, 12.51. HRMS (ESI) calcd for C<sub>20</sub>H<sub>13</sub>F<sub>2</sub>N<sub>5</sub>O<sub>2</sub>S [M+H]<sup>+</sup>: 426.0831; found 426.0833. HPLC purity = 99.15%, Rt 1.87 min.

**N-(3-((3-cyclopropyl-1H-pyrazolo[3,4-b]pyridin-5-yl)ethynyl)-2,4-difluorophenyl)pyridine-3-sulfonamide 3m** <sup>1</sup>H NMR(400 MHz, DMSO-d<sub>6</sub>): δ(ppm) 13.48(s, 1H), 10.63(brs, 1H), 8.88(s, 1H), 8.85(d, J = 4.5 Hz, 1H), 8.60(s, 1H), 8.55(s, 1H), 8.12(d, J = 7.9 Hz, 1H), 7.65(t, J = 6.5 Hz, 1H), 7.32(dd, J = 14.6, 8.5 Hz, 1H), 7.24(t, J = 8.8 Hz, 1H), 2.35-2.40(m, 1H), 0.99-1.02(m, 4H). <sup>13</sup>C NMR (125 MHz, DMSO-d<sub>6</sub>): δ(ppm) 161.25(d, J = 252 Hz, 1C), 157.69(dd, J = 252,6 Hz, 1C), 154.08, 151.75, 151.31, 147.70, 147.38, 136.62, 135.07, 133.39, 129.40(d, J = 10 Hz, 1C), 124.81, 121.30(d, J = 12 Hz, 1C), 113.26, 112.56(dd, J = 22,3 Hz, 1C), 110.09, 102.11(t, J = 20 Hz, 1C), 98.21, 76.50, 8.48, 8.31(2 C). HRMS (ESI) calcd for C<sub>22</sub>H<sub>15</sub>F<sub>2</sub>N<sub>5</sub>O<sub>2</sub>S [M+H]<sup>+</sup>: 452.0987; found 452.0990. HPLC purity = 98.46%, Rt 7.68 min.

**N-(2,4-difluoro-3-((1-phenyl-3H-pyrazolo[3,4-b]pyridin-6-yl)ethynyl)phenyl)pyridine-3-sulfonamide 3n**

<sup>1</sup>H NMR(400 MHz, DMSO-d<sub>6</sub>): δ(ppm) 14.14(s, 1H), 10.63(s, 1H), 8.90(m, 2H), 8.80(s, 1H), 8.71(s, 1H), 7.13(d, J = 7.9 Hz, 1H), 8.08(d, J = 7.5 Hz, 1H), 7.67(m, 1H), 7.54(t, J = 7.4 Hz, 2H), 7.45(s, 1H), 7.33(dd, J = 14.5, 8.4 Hz, 1H), 7.26(t, J = 8.7 Hz, 1H). <sup>13</sup>C NMR (125 MHz, DMSO-d<sub>6</sub>): δ(ppm) 161.40(dd, J = 251,14 Hz, 1C), 157.78(dd, J = 253,5 Hz, 1C), 154.09, 152.23, 151.56, 147.39, 143.84, 136.82, 135.04, 134.23, 132.86, 129.61(d, J = 10 Hz, 1C), 129.53(2C), 128.91, 127.20(2C), 125.09, 121.18(dd, J = 12,3 Hz, 1C), 112.61(dd, J = 22,3 Hz, 1C), 111.93, 111.66, 102.09(t, J = 20 Hz, 1C), 98.02, 76.95. HRMS (ESI) calcd for C<sub>25</sub>H<sub>15</sub>F<sub>2</sub>N<sub>5</sub>O<sub>2</sub>S [M+H]<sup>+</sup>: 488.0987; found 488.0987. HPLC purity = 94.74%, Rt 2.22 min.

**N-(2,4-difluoro-3-((1-(pyridin-4-yl)-3H-pyrazolo[3,4-b]pyridin-6-yl)ethynyl)phenyl)pyri**

**dine-3-sulfonamide 3o**

<sup>1</sup>H NMR(400 MHz, DMSO-d<sub>6</sub>): δ(ppm): 14.48(s, 1H), 10.54-10.79(brs, 1H) 8.97(s, 1H) 8.90(m, 1H), 8.87(d, J = 3.95 Hz, 1H), 8.76(m, 2H), 8.12(m, 3H), 7.68(dd, J = 4.85, 7.95 Hz, 1H), 7.35(m, 1H), 7.28(t, J = 8.7 Hz, 1H). <sup>13</sup>C NMR (125 MHz, DMSO-d<sub>6</sub>): δ(ppm) 161.42(d, J = 250 Hz, 1C), 157.80(dd, J = 254,5 Hz, 1C), 154.15, 152.28, 151.90, 150.76(2C), 147.40, 141.31, 139.85, 136.58, 135.09, 134.13, 129.74(d, J = 9 Hz, 1C), 124.84, 121.29(2C), 121.20, 112.65(dd, J = 22,3 Hz, 1C), 112.33, 112.09, 101.99(t, J = 20 Hz, 1C), 97.76, 77.26. HRMS (ESI) calcd for C<sub>24</sub>H<sub>14</sub>F<sub>2</sub>N<sub>6</sub>O<sub>2</sub>S [M+H]<sup>+</sup>: 489.0940; found 489.0939. HPLC purity = 95.81%, Rt 8.49 min.

**N-(2,4-difluoro-3-((1-(4-fluorophenyl)-3H-pyrazolo[3,4-b]pyridin-6-yl)ethynyl)phenyl)pyridine-3-sulfonamide 3s**

<sup>1</sup>H NMR(400 MHz, DMSO-d<sub>6</sub>): δ(ppm): 14.14(s, 1H), 10.62(s, 1H), 8.90(m, 2H), 8.80(s, 1H), 8.70(s, 1H), 8.13(m, 3H), 7.67(m, 1H), 7.33(m, 3H), 7.35(m, 1H). <sup>13</sup>C NMR (125 MHz, DMSO-d<sub>6</sub>): δ(ppm) 163.65 (d, J = 244 Hz, 1C), 161.31(d, J = 250 Hz, 1C), 157.78(d, J = 252 Hz, 1C), 154.08, 152.18, 151.61, 147.42, 142.94, 134.95, 134.19, 129.47-129.60(m, 1C), 129.36(2C), 129.29, 125.56, 121.34-121.24(m, 1C), 116.42(d, J = 21 Hz, 2C), 112.56(d, J = 21 Hz, 1C), 111.76(d, J = 7 Hz, 1C), 101.84(t, J = 19 Hz, 1C), 77.01. HRMS (ESI) calcd for C<sub>25</sub>H<sub>14</sub>F<sub>3</sub>N<sub>5</sub>O<sub>2</sub>S [M+H]<sup>+</sup>: 506.0893; found 506.0893. HPLC purity = 95.06%, Rt 7.65 min.

**N-(3-((3-(4-chlorophenyl)-1H-pyrrolo[2,3-b]pyridin-5-yl)ethynyl)-2,4-difluorophenyl)pyridine-3-sulfonamide 3r**

<sup>1</sup>H NMR(400 MHz, DMSO-d<sub>6</sub>): δ(ppm) 12.36(s, 1H), 10.40-10.80(brs. 1H), 8.80-8.25(brs. 1H), 8.45(m, 2H), 8.12(d, J = 8.4 Hz, 1H), 8.05(s, 1H), 7.79(d, J = 8.2 Hz, 2H), 7.68(m, 1H), 7.49(d, J = 8.2 Hz, 2H), 7.29(m, 1H), 7.23(m, 1H). <sup>13</sup>C NMR (125 MHz, DMSO-d<sub>6</sub>): δ(ppm) 161.39(dd, J = 251,3Hz, 1C), 157.78(dd, J = 254,50 Hz, 1C), 154.12, 152.20, 151.66, 147.40, 142.66, 136.84, 135.04, 134.14, 133.53, 131.68, 129.65(d, J = 11 Hz, 1C), 129.43(2C), 128.84(2C), 125.02, 121.18(dd, J = 12,4 Hz, 1C), 112.61(dd, J = 9,3 Hz, 1C), 111.80, 102.03(t, J = 20 Hz, 1C), 97.91, 77.05. HRMS (ESI) calcd for C<sub>25</sub>H<sub>14</sub>ClF<sub>2</sub>N<sub>5</sub>O<sub>2</sub>S [M+H]<sup>+</sup>: 522.0598; found 522.0597. HPLC purity = 96.09%, Rt 9.79 min.

**N-(3-((3-(3-chlorophenyl)-1H-pyrrolo[2,3-b]pyridin-5-yl)ethynyl)-2,4-difluorophenyl)pyridine-3-sulfonamide 3q**

<sup>1</sup>H NMR(400 MHz, DMSO-d<sub>6</sub>): δ(ppm) 14.26(s, 1H), 10.61(m, 1H),

8.88(d, J = 2.0 Hz, 1H), 8.85(m, 2H), 8.72(d, J = 1.8 Hz, 1H), 8.13(m, 1H), 8.06(m, 2H), 7.66(dd, J = 4.8, 8.1 Hz, 1H), 7.56(t, J = 7.6 Hz, 8.1H), 7.52(m, 1H), 7.35(m, 1H), 7.26(t, J = 8.6 Hz, 1H).  $^{13}\text{C}$  NMR (125 MHz, DMSO- $d_6$ ):  $\delta$ (ppm) 161.34(d, J = 251 Hz, 1C), 157.72(d, J = 254 Hz, 1C), 154.10, 151.55, 147.38, 142.80, 136.51, 135.05, 134.12, 132.69, 132.56, 131.41, 130.91, 130.50, 129.61(d, J = 9 Hz, 1C), 127.90, 124.79, 121.09(dd, J = 12, 3 Hz, 1C), 113.13, 112.58(dd, J = 21, 3 Hz, 1C), 111.50, 102.00(t, J = 20 Hz, 1C), 97.75, 76.96. HRMS (ESI) calcd for C<sub>25</sub>H<sub>14</sub>ClF<sub>2</sub>N<sub>5</sub>O<sub>2</sub>S [M+H]<sup>+</sup>: 522.0598; found 522.0598. HPLC purity = 98.5%, Rt 7.68 min.

**N-(3-((3-(2-chlorophenyl)-1H-pyrrolo[2,3-b]pyridin-5-yl)ethynyl)-2,4-difluorophenyl)pyridine-3-sulfonamide 3p**  $^1\text{H}$  NMR(400 MHz, DMSO- $d_6$ ):  $\delta$ (ppm) 10.60(s, 1H), 8.86(d, J = 1.9 Hz, 1H), 8.84, 8.72(d, J = 2.0 Hz, 1H), 8.34(d, J = 1.9 Hz, 1H), 8.10(m, 1H), 7.67(m, 3H), 7.53(m, 12H), 7.31(m, 1H), 7.23(t, J = 8.7 Hz, 1H).  $^{13}\text{C}$  NMR (125 MHz, DMSO- $d_6$ ):  $\delta$ (ppm) 161.33(dd, J = 250, 4 Hz, 1C), 157.71(dd, J = 254, 6 Hz, 1C), 154.11, 148.81, 147.40, 146.13, 136.84, 136.63, 135.06, 134.11, 131.16, 130.93, 129.26 (d, J = 10 Hz, 1C), 126.83, 126.26, 125.48, 124.88, 121.09(d, J = 9 Hz, 1C), 116.98, 113.87, 112.54(dd, J = 22, 4 Hz, 1C), 110.56, 102.37(t, J = 20 Hz, 1C), 99.10, 76.21. HRMS (ESI) calcd for C<sub>25</sub>H<sub>14</sub>ClF<sub>2</sub>N<sub>5</sub>O<sub>2</sub>S [M+H]<sup>+</sup>: 522.0598; found 522.0599. HPLC purity = 98.4%, Rt 10.61 min.

#### Scheme S1. Synthesis of Compounds 14a and 14b<sup>a</sup>

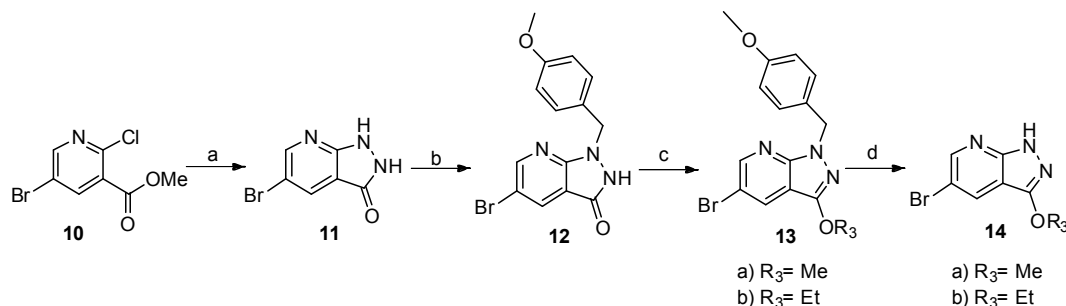

<sup>a</sup>Reagents and conditions: (a) NH<sub>2</sub>NH<sub>2</sub>·H<sub>2</sub>O, EtOH, 80 °C, overnight, 93%; (b) NaOH, DMSO, p-methoxybenzyl chloride, rt, 1 h, 62%; (c) NaH, R<sub>3</sub>I, DMF, rt, overnight, 47%-53%; (d) TFA, reflux, overnight, 87%.

#### Scheme S2. Synthesis of Compounds 19<sup>a</sup>

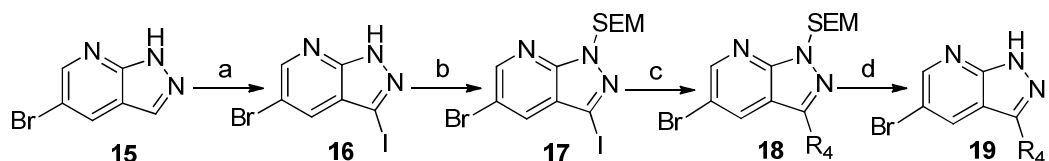

<sup>a</sup>Reagents and conditions: (a) NIS, 1,2-dichloroethane, reflux, overnight, 68%; (b) SEM-Cl, NaH, DMF, 0°C-rt, 2h, 63%; (c) R<sub>4</sub>B(OH)<sub>2</sub>, Pd(dppf)Cl<sub>2</sub>, K<sub>3</sub>PO<sub>4</sub>, 1,4-dioxane, 80°C, 5h, 37–73%; (d) DCM:TFA=1:1, reflux, overnight, 70-84%.

**5-Bromo-1H-pyrazolo[3,4-b]pyridin-3-ol 11.** A solution of **10** (4.0 g, 16.0 mmol) in ethanol (40.0 ml) was added hydrazine hydrate (12.9 ml, 48 mmol, 3 eq) and then stirred overnight at 80°C. After completion, the precipitated white solid was filtered, washed with ethanol and water, and dried to afford the desired product. (3.16 g, yield: 93%). <sup>1</sup>H NMR (400 MHz, *d*-DMSO), δ 8.46 (d, *J* = 2.0 Hz, 1 H), 8.34 (d, *J* = 2.0 Hz, 1 H).

**5-Bromo-1-(4-methoxybenzyl)-1H-pyrazolo[3,4-b]pyridin-3-ol 12.** To a solution of **11** (1.5 g, 7.0 mmol) and NaOH (0.42 g, 10.5 mmol, 1.5 eq) in DMSO (20.0 ml) was added 4-methoxybenzyl-chloride (1.7g, 10.5 mmol, 1.5 eq) slowly under Ar atmosphere. After stirring for 1h at room temperature, the reaction mixture was diluted with ethyl acetate, washed with water, NaHCO<sub>3</sub> (aq.) and brine. The organic layer was dried over anhydrous Na<sub>2</sub>SO<sub>4</sub> and concentrated to afford the product which was further purification through recrystallization in EA-PE solvent. (1.85 g, yield: 61.8 %) <sup>1</sup>H NMR (400 MHz, *d*-DMSO), δ 10.82-11.18(brs, 1H), 8.56(d, *J* = 2.2 Hz, 1H), 8.33(d, *J* = 2.2 Hz, 1H), 7.18(d, *J* = 8.6 Hz, 1H), 6.86(d, *J* = 8.6 Hz, 1H), 6.33(s, 2H), 3.70(s, 3H).

**5-Bromo-3-methoxy-1-(4-methoxybenzyl)-1H-pyrazolo[3,4-b]pyridine 13a.** Compound **12** (1.85 g, 5.5 mmol) was dissolved in DMF (20.0 ml) under ice base and then sodium hydride (60% in oil) (0.27g, 6.7 mmol, 1.2 eq) was added and stirred for 15 minutes. After addition of methyl iodide (0.42 ml, 6.7 mmol, 1.2 eq), the reaction mixture was stirred overnight. The residue was then diluted with ethyl acetate, washed with water (3 times) and brine, dried over anhydrous Na<sub>2</sub>SO<sub>4</sub> and concentrated, which was purified by column chromatography, eluting with petroleum ether/ EtOAc (30:1) to give the desired product. (0.9 g, yield: 46.6%) <sup>1</sup>H NMR (400 MHz, *d*-DMSO), δ 8.61 (d, *J* = 2.4 Hz, 1H), 8.40 (d, *J* = 2.0Hz, 1H), 7.17 (d, *J* = 8.8 Hz, 2H), 6.85 (d, *J* = 8.8 Hz, 2H), 5.41 (s, 2H), 3.99 (s, 3H), 3.70

(s, 3H).

**5-bromo-3-methoxy-1H-pyrazolo[3,4-b]pyridine 14a.** A solution of **13a** (900 mg, 2.5 mmol) in trifluoroacetic acid (10 ml) was heated to reflux overnight. After the reaction was finished, the solvent was evaporated under reduced pressure. The residue was added 10 ml water, adjusted the pH value to 7 and then filtered. The solid was washed with water and ether and dried to give the desired product. (496 mg, yield: 87%) <sup>1</sup>H NMR (400 MHz, *d*-DMSO),  $\delta$  12.80 (s, 1H), 8.54 (d, *J* = 2.0 Hz, 1H), 8.36 (d, *J* = 1.6 Hz, 1H), 4.00 (s, 3H).

**5-bromo-3-iodo-1H-pyrazolo[3,4-b]pyridine 16.** A mixture of **15** (19.7 g, 100 mmol) and NIS (24.8 g, 110 mmol, 1.1 eq) in 1,2-dichloroethane (150 ml) was heated reflux overnight. After cooling to room temperature, the reaction mixture was diluted with THF, washed with Na<sub>2</sub>S<sub>2</sub>SO<sub>3</sub> (aq.) and brine, dried over anhydrous Na<sub>2</sub>SO<sub>4</sub> and concentrated. The crude product was further purified by washing with ether to afford a brown solid. (21.9 g, yield: 68%) <sup>1</sup>H NMR (400 MHz, *d*-DMSO),  $\delta$  14.30 (s, 1 H), 8.63 (d, *J* = 2.0 Hz, 1 H), 8.18 (d, *J* = 2.0 Hz, 1 H).

**5-Bromo-3-iodo-1-((2-(trimethylsilyl)ethoxy)methyl)-1H-pyrazolo[3,4-b]pyridine 17.** To a solution of **16** (20 g, 61.7 mmol) in DMF (154 ml) was added NaH (60% in oil) (6.17 g, 154 mmol, 2.5 eq) portionwisely at 0°C. The reaction mixture was stirred for 0.5 hr and then 2-(trimethylsilyl)ethoxymethyl chloride (17.5 g, 74 mmol, 1.2 eq) was added. The reaction was stirred for another 2.0 h at the same temperature. The ice-water was carefully added to quench the excess sodium hydride. The resulting slurry was extracted with EtOAc three times, washed with brine, dried and concentrated. The residue was purified through flash column chromatography, eluting with petroleum ether/ EtOAc (30:1) to give the desired product as a white solid. (17.7 g, yield: 63.2%) <sup>1</sup>H NMR (400 MHz, *d*-DMSO),  $\delta$  8.72 (d, *J* = 2.0 Hz, 1 H), 8.25 (d, *J* = 2.0 Hz, 1 H), 5.73 (s, 2 H), 3.58 (t, *J* = 8.0 Hz, 2 H), 0.82 (t, *J* = 8.4 Hz, 2 H), -0.12 (s, 9 H).

**5-bromo-3-(4-fluorophenyl)-1-((2-(trimethylsilyl)ethoxy)methyl)-1H-pyrazolo[3,4-b]pyridine 18a.** A mixture of **21a** (1.0 g, 2.2 mmol), 4-fluorobenzeneboronic acid (0.308 g, 2.2 mmol, 1 eq), K<sub>3</sub>PO<sub>4</sub> (1.17 g, 4.4 mmol, 2 eq) and Pd(dppf)Cl<sub>2</sub>-DCM (0.18 g, 0.22 mmol, 0.1 eq) in 1,4-dioxane (5.0 ml) was added to a sealed tube. The tube was evacuated and backfilled with argon (3 cycles). After stirring at 80°C for 5h, the reaction mixture was filtered and

concentrated. The residue was purified by flash column chromatography on silica gel, eluting with petroleum ether/ EtOAc (20:1) to afford the desired product as white solid. (0.687 g, yield: 74%). <sup>1</sup>H NMR (400 MHz, CDCl<sub>3</sub>), δ 8.57(d, *J* = 2.0 Hz, 1H), 8.36(d, *J* = 2.4 Hz, 1H), 7.87(m, 1H), 7.16(t, *J* = 8.8 Hz, 1H), 5.85 3.69(t, *J* = 8.4 Hz, 1H), 0.94(t, *J* = 8.4 Hz, 1H), -0.06(s, 9H).

**5-bromo-3-(4-fluorophenyl)-1H-pyrazolo[3,4-b]pyridine 19b.** A solution of **22**(0.687g, 1.62 mmol) in 20 ml DCM and trifluoroacetic acid (3:1) was heated to reflux overnight. After the reaction was finished, the solvent was evaporated under reduced pressure. The residue was added 10 ml water, adjusted the pH value to 7 and then filtered. The solid was washed with water and ether and dried to give the desired product. (396mg, yield: 84%) <sup>1</sup>H NMR (400 MHz, *d*-DMSO), δ 8.71(d, *J* = 1.6 Hz, 1H), 8.38(d, *J* = 2.0 Hz, 1H), 7.82-7.85 (m, 2H), 7.14-7.19(m, 3H).

**Computational Study.** All the procedure was performed in Maestro 9.9 (Schrodinger LLC). The crystal structures of B-Raf protein and vemurafenib were taken from PDB ID 3OG7. The protein was processed using the “Protein Preparation Wizard” workflow in Maestro 9.9 (Schrodinger LLC) to adding bond orders and add hydrogens. All hetatm residues and crystal water molecules beyond 5 Å from het group were removed. **3a** and **3o** were built by in LigPrep module using OPLS-2005 force field. Glide module was used as docking program. The grid-enclosing box was placed on the centroid of the binding ligand in the optimized crystal structure as described above, and a scaling factor of 1.0 was set to van der Waals (VDW) radius of those receptor atoms with partial atomic charges of less than 0.25. Extra precision (XP) approach of Glide was adopted to dock **3a** and **3s** to B-Raf with the default parameters, and the top-ranking pose was selected to minimized the energy using Prime MM-GBSA, under the solvation model of VSGB.

**In Vitro Enzymatic Activity Assay.** B-Raf<sup>V600E</sup> (as B-Raf<sup>N599E</sup> in supplier’s catalogue) and the Z'-Lyte Kinase Assay Kit were purchased from Invitrogen. The experiments were performed according to the instructions of the manufacturer. The concentrations of kinases were determined by optimization experiments and the respective concentration was: BRAF<sup>V600E</sup> (PV4173, Invitrogen) 0.22 µg/ µL. First, the compounds were diluted three-fold

from  $5.1 \times 10^{-9}$  M to  $1 \times 10^{-4}$  M in DMSO and a 400  $\mu$ M compound solution was prepared (4  $\mu$ L compound dissolved in 96  $\mu$ L water). Second, a 100  $\mu$ M ATP solution in 1.33 $\times$ Kinase Buffer was prepared. Third, a kinase/peptide mixture containing 2 $\times$ kinase and 4  $\mu$ M Tyr 4 peptide (Invitrogen, PV3193) was prepared right before use.

Kinase/peptide mixture was prepared by diluting Z'-LYTE Ser/Thr3 peptide (Invitrogen, PV3176 ) and three kinases (B-Raf, MAP2K1/MEK1 (Invitrogen, P3093), MAPK1/ERK2 (Invitrogen, PV3314)) in 1 $\times$ Kinase Buffer, and 0.2  $\mu$ M Ser/Thr3 phospho-peptide solution was made by adding Z'-LYTE Ser/Thr3 phospho-peptide to 1 $\times$ Kinase Buffer. The final 10  $\mu$ L reaction consists of 0.002 ng of B-Raf, 10 ng inactive MAP2K1 (MEK1), 100 ng inactive MAPK1 (ERK2), 2  $\mu$ M Ser/Thr3 peptide in 1 $\times$ kinase buffer.

For each assay, 10  $\mu$ L kinase reactions were made at first (including 2.5  $\mu$ L compound solution, 5  $\mu$ L Kinase/Peptide Mixture, and 2.5  $\mu$ L ATP solution). Mixed the plate thoroughly and incubated for one hour at room temperature. Then 5  $\mu$ L development solution was added to each well and the plate was incubated for 1h at room temperature; the nonphosphopeptides were cleaved at this time. In the end, 5  $\mu$ L stop reagent was loaded to stop the reaction. For the control setting, 5  $\mu$ L phospho-peptide solution instead of kinase/peptide mixture was used as 100% phosphorylation control. 2.5  $\mu$ L 1.33 $\times$ Kinase Buffer instead of ATP solution was used as 100% inhibition control, and 2.5  $\mu$ L 4% DMSO instead of compound solution was used as the 0% inhibitor control. The plate was measured on an *EnVision* Multilabel Reader (Perkin-Elmer). Curve fitting and data presentations were performed using Graph Pad Prism, version 5.0. Every experiment was repeated at least 2 times.

**Cell Proliferation and Growth Inhibition Assay. a.** The human colorectal adenocarcinoma cell lines HT-29, HCT-116, Colo205, LOVO and malignant melanoma cell lines A375, SK-MEL-28, SK-MEL-2, SK-MEL-1 were purchased from ATCC. HT-29 and HCT116 were maintained in McCoy's 5a with 10% FBS, Colo205, LOVO and A375 were maintained in RPMI-1640, F12K and DMEM with 10% FBS respectively, while SK-MEL-2, SK-MEL-1 and SK-MEL-28 were grown in Eagle's Minimum Essential Medium with 10% FBS. Cells of log phase were used. 1000-3000 cells/well were seeded in 96-well plates with a 100  $\mu$ L volume, and 6 parallels and 8 rows were designed. Compounds were dissolved to 10  $\mu$ M with DMSO, and a 5-fold serial dilution of the compounds from  $1 \times 10^{-5}$  M to  $0.64 \times 10^{-9}$  M



was performed. 2  $\mu\text{L}$  of compound solution was added to 998  $\mu\text{L}$  of growth medium, the mixture was vortexed sufficiently. 100  $\mu\text{L}$  of the mixture was correspondingly added to the 96-well plate. 2  $\mu\text{L}$  DMSO instead of compound solution was used as the 0% inhibitor control. After coincubation for 68 h, 20  $\mu\text{L}$  MTT (5mg/ml) was added. 4h later, the supernatant was discarded completely and 150  $\mu\text{L}$  DMSO was added. After shaking for 10 min, the plates were read in the Synerg HT (Bio Tek) at 570 nm. The data was calculated using Graph Pad Prism version 4.0. The  $\text{IC}_{50}$  were fitted using a nonlinear regression model with a sigmoidal dose response. **b.** Monolayer cultures of primary melanoma cells were harvested, counted and seeded into 96-well plates at appropriate densities (2500 cells/well for NZM07, 6000 cells/well for NZM09, 4000 cells/well for NZM20 and 500-1000 cells/well for NZM40). Cells were allowed to settle for 24 hours in 5%  $\text{O}_2$  incubators. Cells were then treated with each test compound for a continuous exposure of 5 days under 5%  $\text{O}_2$  conditions. Cells were fixed in 1% trichloroacetic acid (TCA) and stained with Sulforhodamine B (SRB) to measure total cells. Cell density was determined using Biotek ELx808 Absorbance Microplate Reader.  $\text{IC}_{50}$  values for each compound were determined by interpolation as the drug concentration reducing staining to 50% of untreated control wells on the same plate.

**Western Blot. a.** log-phase primary melanoma NZM20 and NZM40 cells were seeded into 6-well plates at a density of 1 million cells per well and were incubated for 24 hours under 5%  $\text{O}_2$  conditions. Drug stock solutions were diluted in media to achieve final concentrations in each well. Following 2 hours of drug exposure, cells were washed in ice-cold PBS and lysed on ice for 30 minutes with radioimmunoprecipitation assay (RIPA) buffer containing 100 $\times$  protease inhibitor, and sodium orthovanadate and sodium fluoride at final concentrations of 1 mM each. Cell debris was pelleted out by centrifugation (13,000 rpm for 2 minutes). Protein concentrations in each sample were determined by a bicinchoninic acid (BCA) assay. Equivalent amounts of protein (20  $\mu\text{g}$ ) were denatured (98  $^{\circ}\text{C}$  for 5 minutes) and loaded onto 4-20% pre-cast Bis-Tris protein gels for protein separation. Following transfer to a nitrocellulose membrane, each membrane was blocked with 5% bovine serum albumin (in Tris-buffered saline) for 1 hour. Primary antibody against ERK/MAPK (total or phospho-specific) or  $\alpha$ -tubulin was added overnight at 4  $^{\circ}\text{C}$  in 5% bovine serum albumin (with

Tris-buffered saline). Excess primary antibody in each membrane was washed off with Tris-buffered saline. Secondary antibody was added to each membrane for 2 hours. For protein detection, the membrane was washed in Tris-buffered saline to remove excess secondary antibody and chemiluminescent substrate was added (Pierce Supersignal West Pico Chemiluminescent Substrate) for 5 minutes. The membrane was viewed using a Fujifilm LAS 4000 imager. **b.**  $1 \times 10^6$  Cells of Colo205, HTC116 cells were seeded into 6-cm dishes overnight. The medium was changed, and 1, 0.3, 0.1, 0.03, 0.01  $\mu\text{M/L}$  of **3s** was added the next day; medium with 1% DMSO was used as the control. Cells were exposed to treatment after indicated hours. The dishes was washed twice using precold PBS and 400  $\mu\text{L}$  of RIPA then. After incubating plates on ice for 15 min, cells were scraped carefully and centrifuged for 10 minutes at 14,000g at 4 °C immediately. The remaining supernatant and lysates were maintained at -70°C. A BCA protein assay kit (23227, Thermo) was used to quantitate the cell lysates. Proper 5 $\times$  loading buffer was loaded before use, and the samples were denatured by boiling. The same amount of quantitated sample was loaded, and proteins were transferred to the PVDF membrane (Milipore) then. After blocking for 1.0 h at room temperature, diluted primary antibody ERK (CST, 9102), phospho-ERK (t202/y204) (CST, 9101), and GAPDH (KC-5G5, KangChen) were added. A second antibody with horseradish peroxidase (HRP, sigma) conjugated was used then. Blots were developed by enhanced chemiluminescence (Thermo).

**Mice Xenograft Using Colo205.** Male SCID mice were purchased from Vital River Laboratory Animal Technology Inc. (Beijing, China). All animal studies were approved by the Institutional Animal Use and Care Committee of Guangzhou Institute of Biomedicine and Health, Chinese Academy of Science. COLO205 cells were resuspended in normal saline (NS) solution ( $2.5 \times 10^7$  cell/mL). A 0.2 mL amount of cell suspension was injected subcutaneously into the right flank of each mouse. Mice were randomly grouped based on the tumor volume when the mean tumor volume reached 100–200  $\text{mm}^3$ . Compound **3s** (formulated as sodium salts) and drug **1** (used as original power) were dissolved in sodium carboxymethyl cellulose. Mice were treated for the 14 consecutive days by oral gavage with **3a** (50 mg/kg once daily, 100mg/kg once daily, 100mg/kg twice daily), drug **1** (30 mg/kg once daily), and vehicle,

respectively. Tumor volume and body weight were monitored once every 2 days. Tumor volume was calculated as the  $L \times W$  (L and W are the length and width of the tumor, respectively). After the last measurement, mice were sacrificed and the tumor were separated and photographed.

**KINOMEscan™**: kinase-tagged T7 phage strains were prepared in an *E. coli* host derived from the BL21 strain. *E. coli* were grown to log-phase and infected with T7 phage and incubated with shaking at 32°C until lysis. The lysates were centrifuged and filtered to remove cell debris. The remaining kinases were produced in HEK-293 cells and subsequently tagged with DNA for qPCR detection. Streptavidin-coated magnetic beads were treated with biotinylated small molecule ligands for 30 minutes at room temperature to generate affinity resins for kinase assays. The liganded beads were blocked with excess biotin and washed with blocking buffer (SeaBlock (Pierce), 1% BSA, 0.05% Tween 20, 1 mM DTT) to remove unbound ligand and to reduce non-specific binding. Binding reactions were assembled by combining kinases, liganded affinity beads, and test compounds in 1x binding buffer (20% SeaBlock, 0.17x PBS, 0.05% Tween 20, 6 mM DTT). All reactions were performed in polystyrene 96-well plates in a final volume of 0.135 ml. The assay plates were incubated at room temperature with shaking for 1 hour and the affinity beads were washed with wash buffer (1x PBS, 0.05% Tween 20). The beads were then re-suspended in elution buffer (1x PBS, 0.05% Tween 20, 0.5 μM non-biotinylated affinity ligand) and incubated at room temperature with shaking for 30 minutes. The kinase concentration in the eluates was measured by qPCR.

For K<sub>d</sub> determination, an 11-point 3-fold serial dilution of compound **3s** was prepared in 100% DMSO at 100x final test concentration and subsequently diluted to 1x in the assay (final DMSO concentration = 1%). Binding constants (K<sub>d</sub>s) were calculated with a standard dose-response curve using the Hill equation.

For primary screening, compound **3s** were screened at the concentration of 2μM/L, and the results are reported as '% Ctrl'.

**Table S1. Pharmacokinetic Profile of Selected Compounds in Rats<sup>a</sup>**

| compd | iv (5 mg/kg)       |              |             | p.o. (25 mg/kg)    |              |             | F (%) |
|-------|--------------------|--------------|-------------|--------------------|--------------|-------------|-------|
|       | AUC(0-∞)<br>μg/L*h | Cmax<br>μg/L | T1/2<br>(h) | AUC(0-∞)<br>μg/L*h | Cmax<br>μg/L | T1/2<br>(h) |       |
| 3n    | 17,033             | 22,125       | 2.2         | 28,790             | 11,833       | 1.1         | 33.8% |
| 3o    | 10,643             | 27,250       | 2.3         | 3,829              | 1,628        | 1.4         | 7.2%  |
| 3s    | 33,060             | 36,250       | 2.2         | 96,342             | 45,850       | 0.9         | 54%   |

<sup>a</sup>SD rats (male, 3-4 animals per group) weighted 180–220g were used for the study.

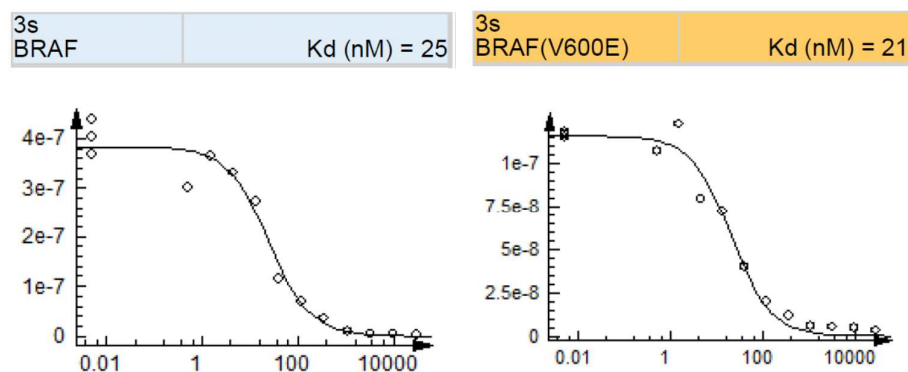

**Figure S2.** Dose-response behaviour of BRAF(wild type)<sub>K<sub>d</sub></sub> and BRAF(V600E)<sub>K<sub>d</sub></sub> upon treatment with inhibitor 3s. The amount of kinase measured by qPCR (Signal; y-axis) is plotted against the corresponding compound concentration in nM in log<sub>10</sub> scale (x-axis).

**Table S2. Matrix of Compound Screen for Inhibitor 3s.**

| Target                        | 3s             |
|-------------------------------|----------------|
| Gene Symbol                   | %Ctrl @ 1000nM |
| AAK1                          | 80             |
| ABL1(E255K)-phosphorylated    | 73             |
| ABL1(F317I)-nonphosphorylated | 84             |
| ABL1(F317I)-phosphorylated    | 100            |
| ABL1(F317L)-nonphosphorylated | 91             |
| ABL1(F317L)-phosphorylated    | 75             |
| ABL1(H396P)-nonphosphorylated | 92             |
| ABL1(H396P)-phosphorylated    | 88             |
| ABL1(M351T)-phosphorylated    | 70             |
| ABL1(Q252H)-nonphosphorylated | 78             |
| ABL1(Q252H)-phosphorylated    | 93             |
| ABL1(T315I)-nonphosphorylated | 86             |

|                            |     |
|----------------------------|-----|
| ABL1(T315I)-phosphorylated | 80  |
| ABL1(Y253F)-phosphorylated | 85  |
| ABL1-nonphosphorylated     | 76  |
| ABL1-phosphorylated        | 71  |
| ABL2                       | 95  |
| ACVR1                      | 95  |
| ACVR1B                     | 97  |
| ACVR2A                     | 80  |
| ACVR2B                     | 89  |
| ACVRL1                     | 90  |
| ADCK3                      | 81  |
| ADCK4                      | 100 |
| AKT1                       | 90  |
| AKT2                       | 79  |
| AKT3                       | 100 |
| ALK                        | 99  |
| ALK(C1156Y)                | 92  |
| ALK(L1196M)                | 97  |
| AMPK-alpha1                | 99  |
| AMPK-alpha2                | 100 |
| ANKK1                      | 99  |
| ARK5                       | 87  |
| ASK1                       | 96  |
| ASK2                       | 94  |
| AURKA                      | 87  |
| AURKB                      | 79  |
| AURKC                      | 86  |
| AXL                        | 96  |
| BIKE                       | 88  |
| BLK                        | 80  |
| BMPR1A                     | 82  |
| BMPR1B                     | 75  |
| BMPR2                      | 77  |
| BMX                        | 67  |
| BRAF                       | 4.1 |
| BRAF(V600E)                | 3.3 |
| BRK                        | 49  |
| BRSK1                      | 100 |
| BRSK2                      | 100 |
| BTK                        | 100 |
| BUB1                       | 45  |
| CAMK1                      | 89  |

|                     |     |
|---------------------|-----|
| CAMK1B              | 84  |
| CAMK1D              | 97  |
| CAMK1G              | 98  |
| CAMK2A              | 64  |
| CAMK2B              | 83  |
| CAMK2D              | 98  |
| CAMK2G              | 92  |
| CAMK4               | 94  |
| CAMKK1              | 59  |
| CAMKK2              | 70  |
| CASK                | 86  |
| CDC2L1              | 90  |
| CDC2L2              | 91  |
| CDC2L5              | 97  |
| CDK11               | 17  |
| CDK2                | 97  |
| CDK3                | 98  |
| CDK4                | 100 |
| CDK4-cyclinD1       | 87  |
| CDK4-cyclinD3       | 86  |
| CDK5                | 91  |
| CDK7                | 71  |
| CDK8                | 41  |
| CDK9                | 100 |
| CDKL1               | 82  |
| CDKL2               | 100 |
| CDKL3               | 100 |
| CDKL5               | 92  |
| CHEK1               | 73  |
| CHEK2               | 70  |
| CIT                 | 77  |
| CLK1                | 95  |
| CLK2                | 81  |
| CLK3                | 98  |
| CLK4                | 85  |
| CSF1R               | 97  |
| CSF1R-autoinhibited | 94  |
| CSK                 | 91  |
| CSNK1A1             | 66  |
| CSNK1A1L            | 90  |
| CSNK1D              | 95  |
| CSNK1E              | 90  |

|                           |     |
|---------------------------|-----|
| CSNK1G1                   | 77  |
| CSNK1G2                   | 70  |
| CSNK1G3                   | 92  |
| CSNK2A1                   | 84  |
| CSNK2A2                   | 85  |
| CTK                       | 84  |
| DAPK1                     | 100 |
| DAPK2                     | 86  |
| DAPK3                     | 79  |
| DCAMKL1                   | 86  |
| DCAMKL2                   | 100 |
| DCAMKL3                   | 75  |
| DDR1                      | 65  |
| DDR2                      | 97  |
| DLK                       | 83  |
| DMPK                      | 92  |
| DMPK2                     | 100 |
| DRAK1                     | 87  |
| DRAK2                     | 88  |
| DYRK1A                    | 62  |
| DYRK1B                    | 61  |
| DYRK2                     | 90  |
| EGFR                      | 79  |
| EGFR(E746-A750del)        | 91  |
| EGFR(G719C)               | 87  |
| EGFR(G719S)               | 92  |
| EGFR(L747-E749del, A750P) | 100 |
| EGFR(L747-S752del, P753S) | 82  |
| EGFR(L747-T751del,Sins)   | 93  |
| EGFR(L858R)               | 89  |
| EGFR(L858R,T790M)         | 96  |
| EGFR(L861Q)               | 77  |
| EGFR(S752-I759del)        | 95  |
| EGFR(T790M)               | 100 |
| EIF2AK1                   | 86  |
| EPHA1                     | 97  |
| EPHA2                     | 91  |
| EPHA3                     | 100 |
| EPHA4                     | 100 |
| EPHA5                     | 95  |
| EPHA6                     | 100 |
| EPHA7                     | 88  |

|                       |     |
|-----------------------|-----|
| EPHA8                 | 88  |
| EPHB1                 | 88  |
| EPHB2                 | 90  |
| EPHB3                 | 100 |
| EPHB4                 | 94  |
| EPHB6                 | 3.2 |
| ERBB2                 | 100 |
| ERBB3                 | 89  |
| ERBB4                 | 100 |
| ERK1                  | 83  |
| ERK2                  | 95  |
| ERK3                  | 100 |
| ERK4                  | 100 |
| ERK5                  | 96  |
| ERK8                  | 95  |
| ERN1                  | 84  |
| FAK                   | 95  |
| FER                   | 99  |
| FES                   | 91  |
| FGFR1                 | 100 |
| FGFR2                 | 100 |
| FGFR3                 | 81  |
| FGFR3(G697C)          | 100 |
| FGFR4                 | 100 |
| FGR                   | 88  |
| FLT1                  | 89  |
| FLT3                  | 33  |
| FLT3(D835H)           | 47  |
| FLT3(D835V)           | 85  |
| FLT3(D835Y)           | 56  |
| FLT3(ITD)             | 52  |
| FLT3(ITD,D835V)       | 69  |
| FLT3(ITD,F691L)       | 92  |
| FLT3(K663Q)           | 39  |
| FLT3(N841I)           | 66  |
| FLT3(R834Q)           | 91  |
| FLT3-autoinhibited    | 76  |
| FLT4                  | 93  |
| FRK                   | 47  |
| FYN                   | 97  |
| GAK                   | 90  |
| GCN2(Kin.Dom.2,S808G) | 2.2 |



|                              |     |
|------------------------------|-----|
| GRK1                         | 90  |
| GRK2                         | 100 |
| GRK3                         | 98  |
| GRK4                         | 92  |
| GRK7                         | 95  |
| GSK3A                        | 80  |
| GSK3B                        | 83  |
| HASPIN                       | 90  |
| HCK                          | 56  |
| HIPK1                        | 68  |
| HIPK2                        | 87  |
| HIPK3                        | 67  |
| HIPK4                        | 64  |
| HPK1                         | 83  |
| HUNK                         | 47  |
| ICK                          | 73  |
| IGF1R                        | 76  |
| IKK-alpha                    | 100 |
| IKK-beta                     | 93  |
| IKK-epsilon                  | 87  |
| INSR                         | 100 |
| INSRR                        | 100 |
| IRAK1                        | 89  |
| IRAK3                        | 100 |
| IRAK4                        | 98  |
| ITK                          | 100 |
| JAK1(JH1domain-catalytic)    | 83  |
| JAK1(JH2domain-pseudokinase) | 70  |
| JAK2(JH1domain-catalytic)    | 100 |
| JAK3(JH1domain-catalytic)    | 94  |
| JNK1                         | 73  |
| JNK2                         | 100 |
| JNK3                         | 99  |
| KIT                          | 55  |
| KIT(A829P)                   | 77  |
| KIT(D816H)                   | 100 |
| KIT(D816V)                   | 88  |
| KIT(L576P)                   | 42  |
| KIT(V559D)                   | 47  |
| KIT(V559D,T670I)             | 95  |
| KIT(V559D,V654A)             | 90  |
| KIT-autoinhibited            | 91  |

|               |     |
|---------------|-----|
| LATS1         | 100 |
| LATS2         | 60  |
| LCK           | 96  |
| LIMK1         | 52  |
| LIMK2         | 75  |
| LKB1          | 88  |
| LOK           | 74  |
| LRRK2         | 96  |
| LRRK2(G2019S) | 75  |
| LTK           | 84  |
| LYN           | 89  |
| LZK           | 100 |
| MAK           | 100 |
| MAP3K1        | 72  |
| MAP3K15       | 87  |
| MAP3K2        | 93  |
| MAP3K3        | 92  |
| MAP3K4        | 100 |
| MAP4K2        | 100 |
| MAP4K3        | 100 |
| MAP4K4        | 75  |
| MAP4K5        | 76  |
| MAPKAPK2      | 88  |
| MAPKAPK5      | 92  |
| MARK1         | 100 |
| MARK2         | 82  |
| MARK3         | 74  |
| MARK4         | 100 |
| MAST1         | 97  |
| MEK1          | 89  |
| MEK2          | 81  |
| MEK3          | 74  |
| MEK4          | 66  |
| MEK5          | 21  |
| MEK6          | 92  |
| MELK          | 86  |
| MERTK         | 98  |
| MET           | 77  |
| MET(M1250T)   | 88  |
| MET(Y1235D)   | 95  |
| MINK          | 79  |
| MKK7          | 84  |

|           |     |
|-----------|-----|
| MKNK1     | 80  |
| MKNK2     | 94  |
| MLCK      | 30  |
| MLK1      | 80  |
| MLK2      | 74  |
| MLK3      | 95  |
| MRCKA     | 95  |
| MRCKB     | 93  |
| MST1      | 80  |
| MST1R     | 89  |
| MST2      | 98  |
| MST3      | 98  |
| MST4      | 92  |
| MTOR      | 100 |
| MUSK      | 94  |
| MYLK      | 85  |
| MYLK2     | 100 |
| MYLK4     | 63  |
| MYO3A     | 85  |
| MYO3B     | 100 |
| NDR1      | 81  |
| NDR2      | 97  |
| NEK1      | 94  |
| NEK10     | 99  |
| NEK11     | 100 |
| NEK2      | 89  |
| NEK3      | 63  |
| NEK4      | 90  |
| NEK5      | 100 |
| NEK6      | 76  |
| NEK7      | 89  |
| NEK9      | 89  |
| NIK       | 82  |
| NIM1      | 98  |
| NLK       | 100 |
| OSR1      | 100 |
| p38-alpha | 94  |
| p38-beta  | 94  |
| p38-delta | 82  |
| p38-gamma | 99  |
| PAK1      | 97  |
| PAK2      | 87  |

|                       |     |
|-----------------------|-----|
| PAK3                  | 90  |
| PAK4                  | 93  |
| PAK6                  | 96  |
| PAK7                  | 100 |
| PCTK1                 | 100 |
| PCTK2                 | 91  |
| PCTK3                 | 95  |
| PDGFRA                | 73  |
| PDGFRB                | 62  |
| PDPK1                 | 87  |
| PFCDPK1(P.falciparum) | 10  |
| PFPK5(P.falciparum)   | 100 |
| PFTAIRE2              | 98  |
| PFTK1                 | 99  |
| PHKG1                 | 100 |
| PHKG2                 | 92  |
| PIK3C2B               | 91  |
| PIK3C2G               | 96  |
| PIK3CA                | 94  |
| PIK3CA(C420R)         | 93  |
| PIK3CA(E542K)         | 65  |
| PIK3CA(E545A)         | 81  |
| PIK3CA(E545K)         | 67  |
| PIK3CA(H1047L)        | 56  |
| PIK3CA(H1047Y)        | 96  |
| PIK3CA(I800L)         | 77  |
| PIK3CA(M1043I)        | 95  |
| PIK3CA(Q546K)         | 76  |
| PIK3CB                | 79  |
| PIK3CD                | 93  |
| PIK3CG                | 82  |
| PIK4CB                | 74  |
| PIKFYVE               | 96  |
| PIM1                  | 100 |
| PIM2                  | 67  |
| PIM3                  | 90  |
| PIP5K1A               | 83  |
| PIP5K1C               | 69  |
| PIP5K2B               | 100 |
| PIP5K2C               | 97  |
| PKAC-alpha            | 94  |
| PKAC-beta             | 93  |

|                               |      |
|-------------------------------|------|
| PKMYT1                        | 97   |
| PKN1                          | 86   |
| PKN2                          | 100  |
| PKNB(M.tuberculosis)          | 94   |
| PLK1                          | 97   |
| PLK2                          | 85   |
| PLK3                          | 88   |
| PLK4                          | 71   |
| PRKCD                         | 84   |
| PRKCE                         | 100  |
| PRKCH                         | 94   |
| PRKCI                         | 78   |
| PRKCQ                         | 87   |
| PRKD1                         | 100  |
| PRKD2                         | 95   |
| PRKD3                         | 68   |
| PRKG1                         | 96   |
| PRKG2                         | 87   |
| PRKR                          | 83   |
| PRKX                          | 100  |
| PRP4                          | 86   |
| PYK2                          | 100  |
| QSK                           | 97   |
| RAF1                          | 0.55 |
| RET                           | 98   |
| RET(M918T)                    | 89   |
| RET(V804L)                    | 90   |
| RET(V804M)                    | 100  |
| RIOK1                         | 90   |
| RIOK2                         | 90   |
| RIOK3                         | 92   |
| RIPK1                         | 100  |
| RIPK2                         | 90   |
| RIPK4                         | 83   |
| RIPK5                         | 91   |
| ROCK1                         | 88   |
| ROCK2                         | 83   |
| ROS1                          | 100  |
| RPS6KA4(Kin.Dom.1-N-terminal) | 82   |
| RPS6KA4(Kin.Dom.2-C-terminal) | 66   |
| RPS6KA5(Kin.Dom.1-N-terminal) | 95   |
| RPS6KA5(Kin.Dom.2-C-terminal) | 90   |

|                            |     |
|----------------------------|-----|
| RSK1(Kin.Dom.1-N-terminal) | 56  |
| RSK1(Kin.Dom.2-C-terminal) | 100 |
| RSK2(Kin.Dom.1-N-terminal) | 63  |
| RSK2(Kin.Dom.2-C-terminal) | 100 |
| RSK3(Kin.Dom.1-N-terminal) | 90  |
| RSK3(Kin.Dom.2-C-terminal) | 96  |
| RSK4(Kin.Dom.1-N-terminal) | 75  |
| RSK4(Kin.Dom.2-C-terminal) | 99  |
| S6K1                       | 90  |
| SBK1                       | 100 |
| SGK                        | 76  |
| SgK110                     | 100 |
| SGK2                       | 75  |
| SGK3                       | 98  |
| SIK                        | 53  |
| SIK2                       | 100 |
| SLK                        | 92  |
| SNARK                      | 93  |
| SNRK                       | 89  |
| SRC                        | 95  |
| SRMS                       | 54  |
| SRPK1                      | 91  |
| SRPK2                      | 87  |
| SRPK3                      | 55  |
| STK16                      | 61  |
| STK33                      | 83  |
| STK35                      | 99  |
| STK36                      | 89  |
| STK39                      | 80  |
| SYK                        | 77  |
| TAK1                       | 79  |
| TAOK1                      | 100 |
| TAOK2                      | 91  |
| TAOK3                      | 100 |
| TBK1                       | 90  |
| TEC                        | 92  |
| TESK1                      | 86  |
| TGFBR1                     | 90  |
| TGFBR2                     | 93  |
| TIE1                       | 100 |
| TIE2                       | 95  |
| TLK1                       | 95  |

|                              |     |
|------------------------------|-----|
| TLK2                         | 99  |
| TNIK                         | 85  |
| TNK1                         | 61  |
| TNK2                         | 97  |
| TNNI3K                       | 68  |
| TRKA                         | 60  |
| TRKB                         | 81  |
| TRKC                         | 74  |
| TRPM6                        | 68  |
| TSSK1B                       | 90  |
| TSSK3                        | 98  |
| TTK                          | 92  |
| TXK                          | 99  |
| TYK2(JH1domain-catalytic)    | 100 |
| TYK2(JH2domain-pseudokinase) | 93  |
| TYRO3                        | 100 |
| ULK1                         | 100 |
| ULK2                         | 92  |
| ULK3                         | 79  |
| VEGFR2                       | 96  |
| VPS34                        | 68  |
| VRK2                         | 86  |
| WEE1                         | 91  |
| WEE2                         | 91  |
| WNK1                         | 97  |
| WNK2                         | 100 |
| WNK3                         | 100 |
| WNK4                         | 100 |
| YANK1                        | 91  |
| YANK2                        | 99  |
| YANK3                        | 78  |
| YES                          | 88  |
| YSK1                         | 91  |
| YSK4                         | 75  |
| ZAK                          | 1.6 |
| ZAP70                        | 82  |

**Table S3. TREEspot™ Interaction Maps for 3s.**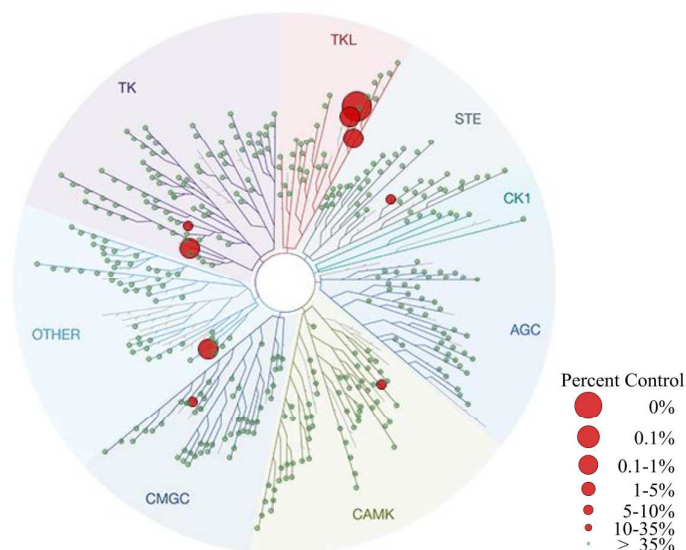**Table S4. S-score Table for 3s.**

| Compound | Selectivity Score type | Number of Hits | Number of Non-Mutant Kinases | Screening Concentration (nM) | Selectivity Score |
|----------|------------------------|----------------|------------------------------|------------------------------|-------------------|
| 3s       | S(35)                  | 10             | 403                          | 1000                         | 0.025             |
| 3s       | S(10)                  | 5              | 403                          | 1000                         | 0.012             |
| 3s       | S(1)                   | 1              | 403                          | 1000                         | 0.002             |

Note:  $S(35) = (\text{number of non-mutant kinases with \%Ctrl} < 35) / (\text{number of non-mutant kinases tested})$ .  $S(10) = (\text{number of non-mutant kinases with \%Ctrl} < 10) / (\text{number of non-mutant kinases tested})$ .  $S(1) = (\text{number of non-mutant kinases with \%Ctrl} < 1) / (\text{number of non-mutant kinases tested})$



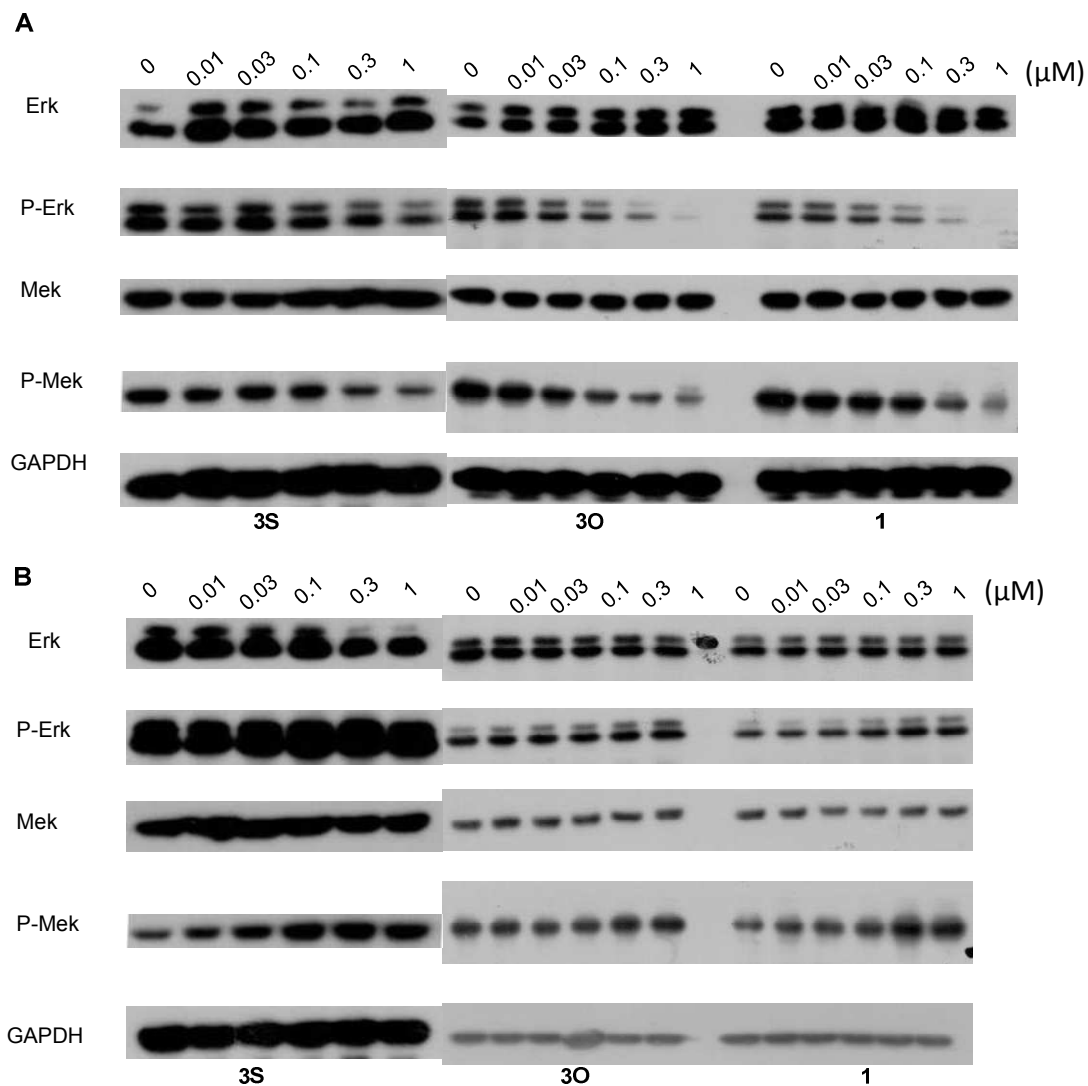

**Figure S3.** **3o** and **3s** dose-dependently inhibit the activation of MAPK pathway in COLO205 colon cancer cells with B-Raf<sup>V600E</sup>, in a similar way of vemurafenib (**1**) (**A**), but elevate the phosphorylation of Mek and Erk in HTC116 cells harboring B-Raf<sup>WT</sup> (**B**).

**Table S5. Enzymatic and Cellular Activities of Dabrafenib (IC<sub>50</sub>, μM/L)**

|            | B-Raf <sup>V600E</sup><br>kinase | B-Raf <sup>V600E</sup> |      |       |       |           | B-Raf <sup>WT</sup> |      |
|------------|----------------------------------|------------------------|------|-------|-------|-----------|---------------------|------|
|            |                                  | colo205                | 435s | HT29  | WiDR  | sk-mel-28 | HCT-116             | H460 |
| dabrafenib | 0.001                            | 0.006                  | >10  | 0.012 | 0.865 | 0.008     | 6.346               | >10  |

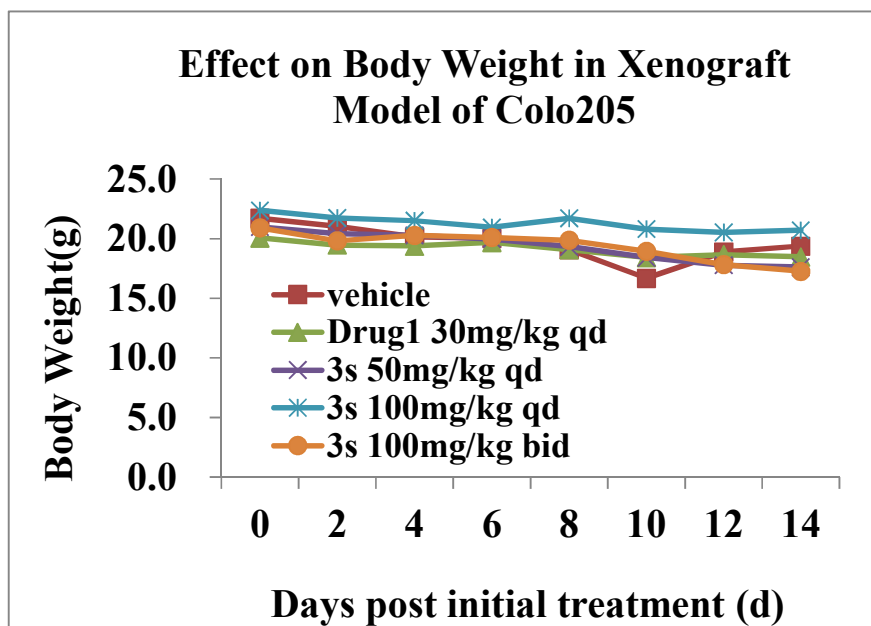

**Figure S4.** 3s do not affect the body weight of mice in xenograft model of Colo205. Days post initial treatment (d; y-axis) is plotted against the corresponding body weight (g; x-axis).

198014

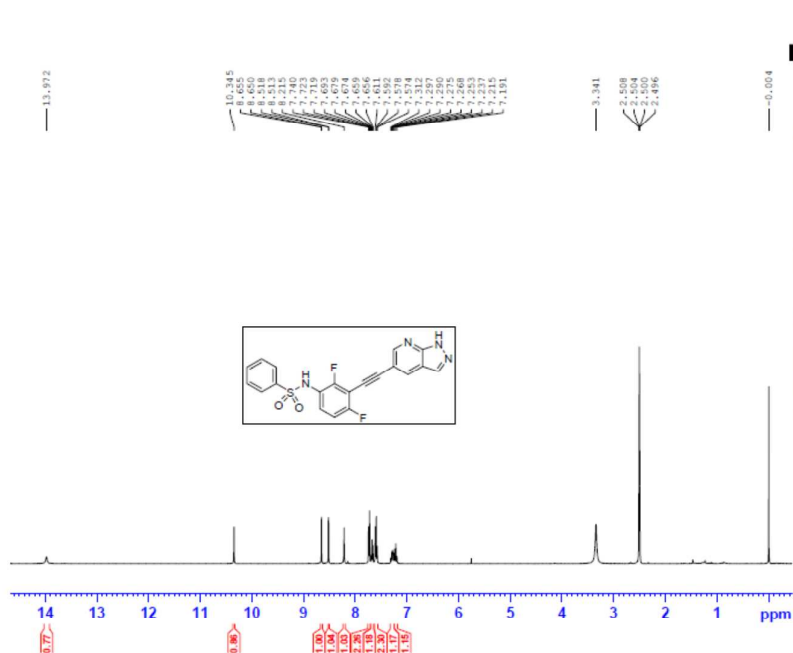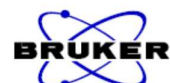

```
NAME          Faf
EXPNO         1
PROCNO       20121107
Date_        11.49
INSTRUM      spect
PROBHD       5 mm PABBO BB-
PULPROG      zg30
TD           65536
SOLVENT      DMSO
NS           14
DS           2
SWH          8276.146 Hz
FIDRES      0.126314 Hz
AQ          3.9564243 sec
RG           382
DM          60.400 usec
DE          4.50 usec
TE           298.4 K
D1          1.00000000 sec
TDO         1
===== CHANNEL f1 =====
NUC1          1H
P1           14.50 usec
PL           0.50 dB
PL1W        10.8764686 W
SFO1        400.1324718 MHz
SI           32768
SF          400.1300023 MHz
WDW          EM
SSB          0
LB           0.30 Hz
GB           0
PC           1.00
```

lyj198106c

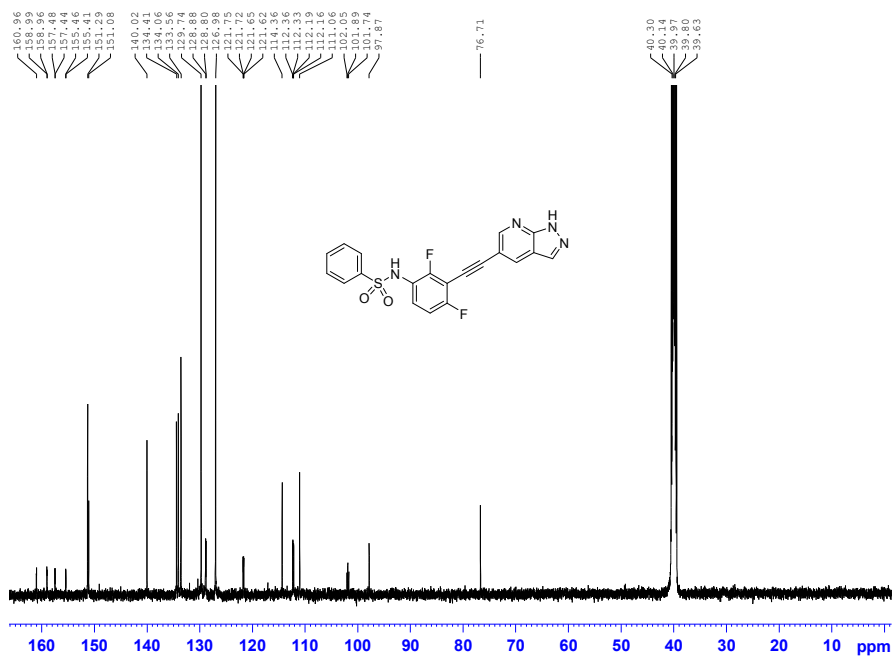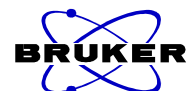

```
NAME          lyj198106c
EXPNO         1
PROCNO       20141011
Date_        11.49
INSTRUM      spect
PROBHD       5 mm PABBO BB-
PULPROG      zgpg30
TD           65536
SOLVENT      DMSO
NS           8000
DS           4
SWH          29761.904 Hz
FIDRES      0.454131 Hz
AQ          1.1510268 sec
RG           203
DM          16.600 usec
DE          6.50 usec
TE           295.0 K
D1          2.00000000 sec
D11         0.03000000 sec
TDO         1
===== CHANNEL f1 =====
NUC1          13C
P1           13.84 usec
PL           2.50 dB
PL1W        46.89624786 W
SFO1        125.7703643 MHz
===== CHANNEL f2 =====
CPDPRG2      waltz16
NUC2          1H
PCPD2       80.00 usec
PL2         2.50 dB
PL12        17.40 dB
PL13        17.40 dB
PL2W        13.02339582 W
PL12W       0.42143536 W
PL13W       0.42143536 W
SFO2        500.1320005 MHz
SI           32768
SF          125.7577566 MHz
WDW          EM
SSB          0
LB           1.00 Hz
GB           0
PC           1.40
```

81461

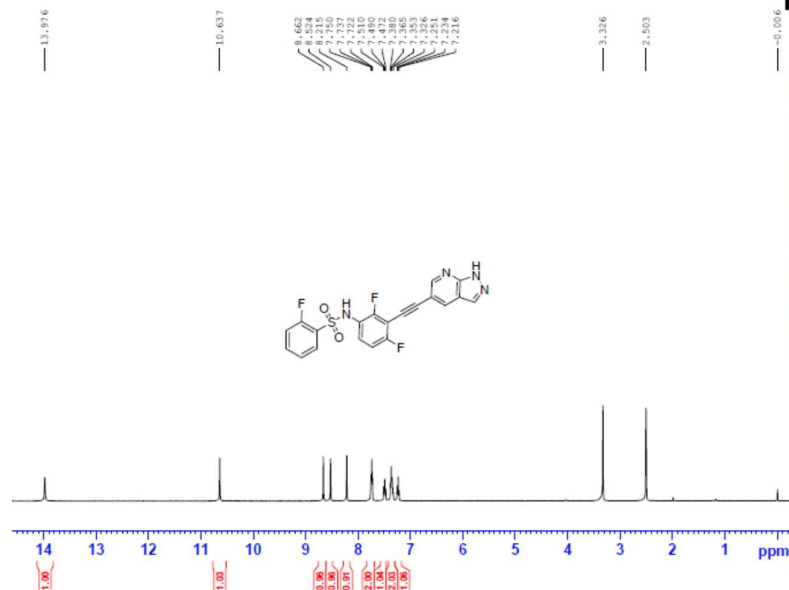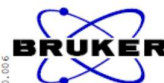

```

NAME          81461
EXPNO         1
PROCNO        1
DATE_         20131023
TIME          18.13
INSTRUM       spect
PROBHD        5 mm PABBO BB-
PULPROG       zgpg30
TD            65536
SOLVENT       DMSO
NS            2
DS            16
SWH           10330.578 Hz
FIDRES        0.187632 Hz
AQ            3.1719523 sec
RG            203
DM            48.450 usec
DE            6.50 usec
TE            298.2 K
D1            1.00000000 sec
D11           1
TDO           1

===== CHANNEL f1 =====
NUC1          1H
P1            14.00 usec
PL1           2.50 dB
PL1W          13.0238885 MHz
SFO1          500.1330885 MHz
SI            32768
SF            500.1300000 MHz
WDW           EM
SSB           0
LB            0.30 Hz
GB            0
PC            1.00
    
```

81461C

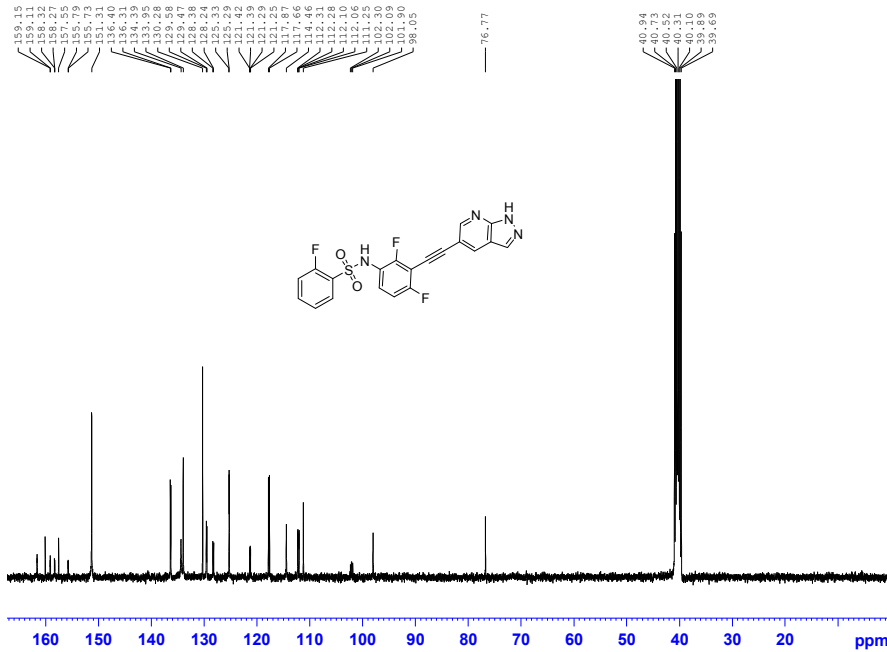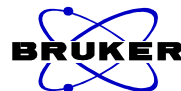

```

NAME          81461
EXPNO         9
PROCNO        1
DATE_         20131115
TIME          6.08
INSTRUM       spect
PROBHD        5 mm PABBO BB-
PULPROG       zgpg30
TD            65536
SOLVENT       DMSO
NS            2
DS            4
SWH           23980.814 Hz
FIDRES        0.365918 Hz
AQ            1.3664706 sec
RG            1149.4
DM            20.850 usec
DE            6.50 usec
TE            311.1 K
D1            2.00000000 sec
D11           1
TDO           0.03000000 sec

===== CHANNEL f1 =====
NUC1          13C
P1            10.25 usec
PL1           0.00 dB
PL1W          38.68303206 MHz
SFO1          100.6228298 MHz

===== CHANNEL f2 =====
CPDPRG2       waltz16
NUC2          1H
PCPD2         80.00 usec
PL2           0.00 dB
PL2W          16.07 dB
PL3           0.00 dB
PL3W          10.87646866 MHz
PL12W         0.26883632 W
PL13W         10.87646866 W
SFO2          400.1316005 MHz
SI            32768
SF            100.6127690 MHz
WDW           EM
SSB           0
LB            1.00 Hz
GB            0
PC            1.40
    
```



Supporting Information

81463

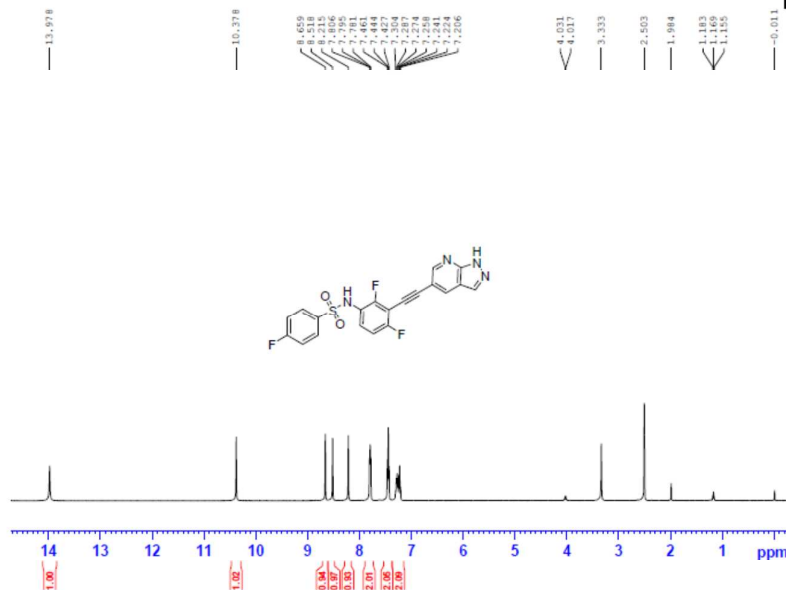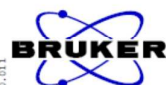

```

NAME          74F
EXPNO         81463
PROCNO       1
Date_         20131029
Time         18.19
INSTRUM      spect
PROBHD       5 mm PABBO BB-
PULPROG      zgpg30
TD           65536
SOLVENT      DMF0
NS           14
DS           2
SWH          10330.578 Hz
FIDRES      0.137603 Hz
AQ          3.1719923 sec
RG           253
DM           48.400 usec
DE           6.50 usec
TE           298.2 K
DE          1.0000000 sec
TDO          1
  
```

```

----- CHANNEL f1 -----
NUC1          1H
P1           14.00 usec
PL1          2.50 dB
PL12         13.02359581 W
SFO1         500.1330885 MHz
SI           32768
SF           500.1300000 MHz
WDW          EM
SSB          0
LB           0.30 Hz
GB           0
PC           1.00
  
```

81463C

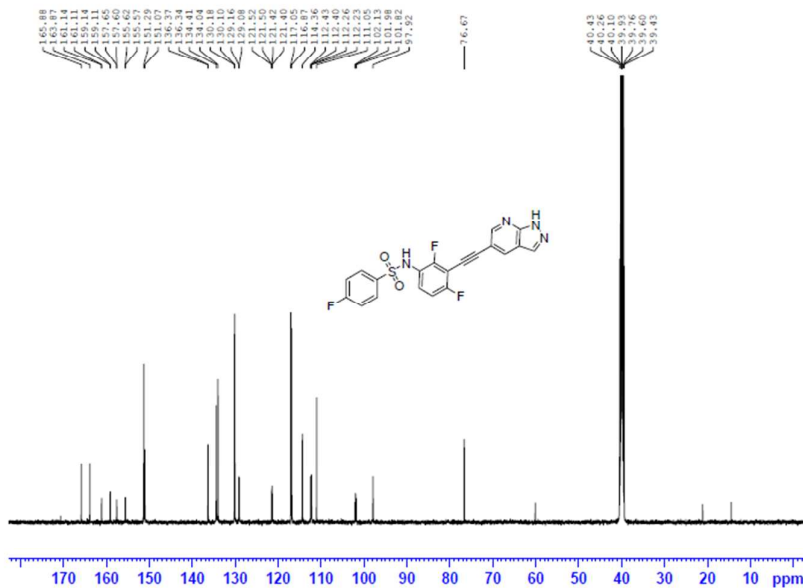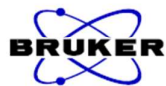

```

NAME          74F
EXPNO         81463C
PROCNO       1
Date_         20131110
Time         4.07
INSTRUM      spect
PROBHD       5 mm PABBO BB-
PULPROG      zgpg30
TD           65536
SOLVENT      DMF0
NS           4
DS           4
SWH          29741.504 Hz
FIDRES      0.434811 Hz
AQ          1.1010248 sec
RG           253
DM           16.800 usec
DE           6.50 usec
TE           298.2 K
DE          2.0000000 sec
TDO          0.0300000 sec
  
```

```

----- CHANNEL f1 -----
NUC1          13C
P1           12.84 usec
PL1          1.50 dB
PL12         46.89424706 W
SFO1         125.7703643 MHz

----- CHANNEL f2 -----
CPDPRG2      waltz16
NUC2          1H
PCPD2       80.00 usec
PL2          7.50 dB
PL12         17.40 dB
PL13         0.4243536 W
PL14         0.4243536 W
PL15         0.4243536 W
SFO2         500.1330885 MHz
SI           32768
SF           125.7577946 MHz
WDW          EM
SSB          0
LB           1.00 Hz
GB           0
PC           1.40
  
```

Supporting Information

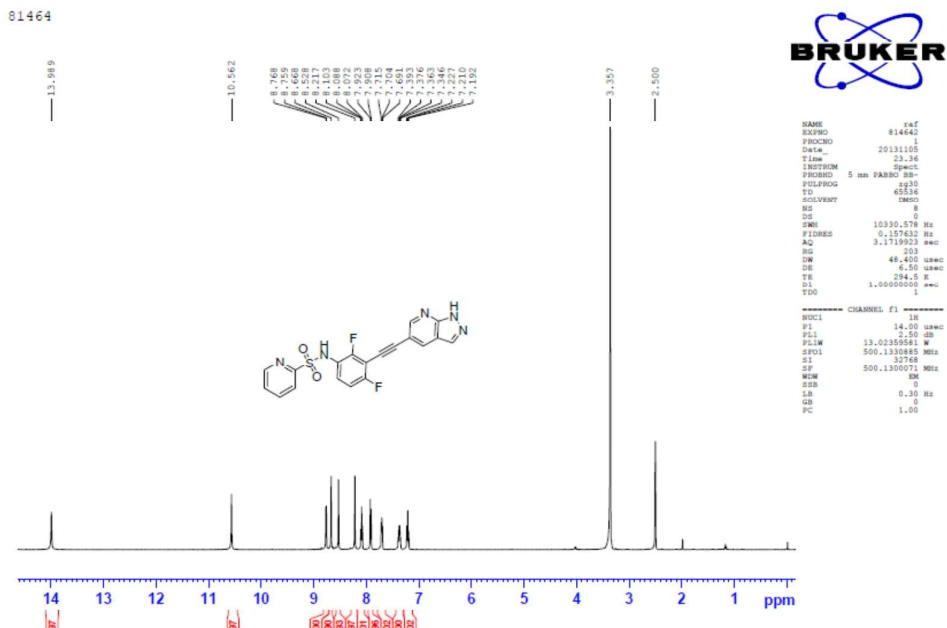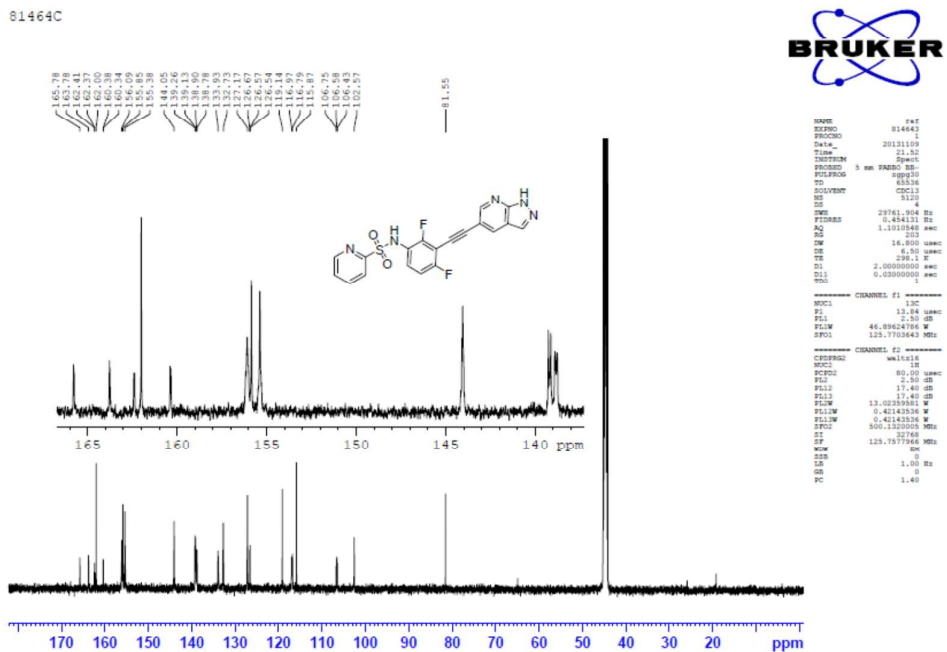

198160

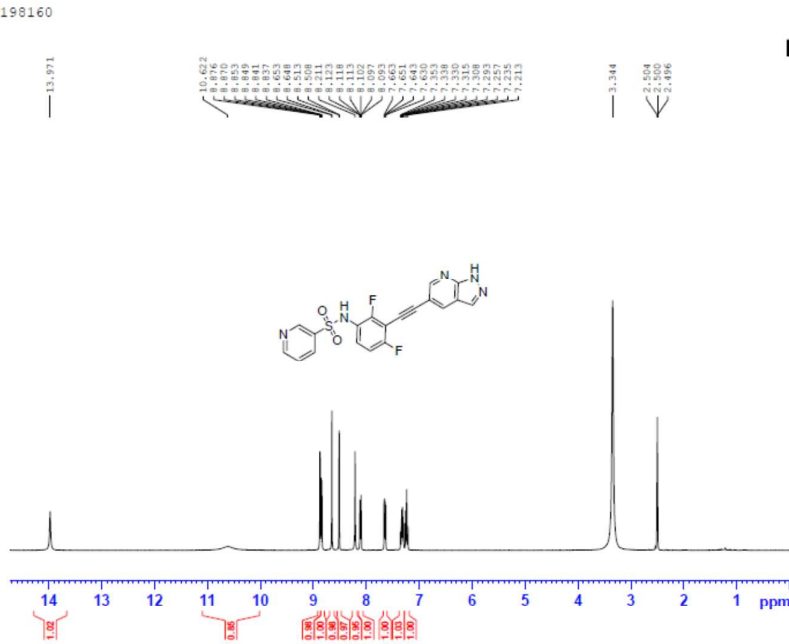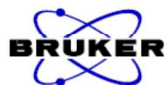

```

NAME          198160
EXPNO         1
PROCNO       20130626
Date_         9.30
INSTRUM      spect
PROBHD       5 mm PABBO BB-
PULPROG      zg30
TD           65536
SOLVENT      CDCl3
NS           16
DS           2
SWH          8278.146 Hz
FIDRES      0.126314 Hz
AQ          3.9584243 sec
RG           324
WDW          60.400 usec
GB           6.50
TE           298.2 K
DS           1.00000000 sec
VDO

===== CHANNEL f1 =====
NUC1         1H
P1           12.58 usec
PL1          0.00 dB
PL12         10.8746846 W
SFO1         400.1324710 MHz
SI           57348
SF           400.1300018 MHz
WDW          60.400 usec
SSB          0
LB           0.30 Hz
GB           0
PC           1.00
    
```

198160

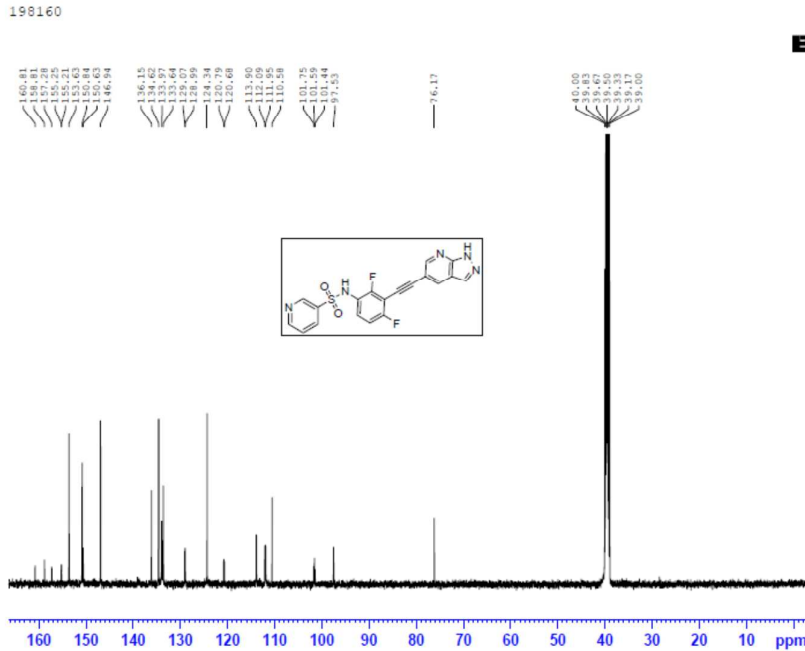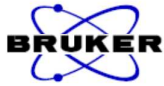

```

NAME          198160
EXPNO         1
PROCNO       20130627
Date_         19.17
INSTRUM      spect
PROBHD       5 mm PABBO BB-
PULPROG      zgpg30
TD           65536
SOLVENT      CDCl3
NS           3000
DS           4
SWH          29761.204 Hz
FIDRES      0.424131 Hz
AQ          1.1010548 sec
RG           320
WDW          16.000 usec
GB           6.50
TE           299.4 K
DS           2.00000000 sec
D11         0.02000000 sec
D12         0.02000000 sec
D13         1

===== CHANNEL f1 =====
NUC1         13C
P1           11.66 usec
PL1          0.00 dB
PL12         83.39463043 W
SFO1         125.7618243 MHz

===== CHANNEL f2 =====
CPDPRG2     waltz16
NUC2         1H
PCPD2       80.00 usec
PL2         2.30 dB
PL12        17.40 dB
PL13        17.40 dB
PL14        11.02335981 W
PL15        4.42142036 W
PL16        4.42142036 W
PL17        4.42142036 W
SFO2         500.1324710 MHz
SI           52748
SF           125.7578258 MHz
WDW          32.000 usec
SSB          0
LB           1.00 Hz
GB           0
PC           1.40
    
```



81461A

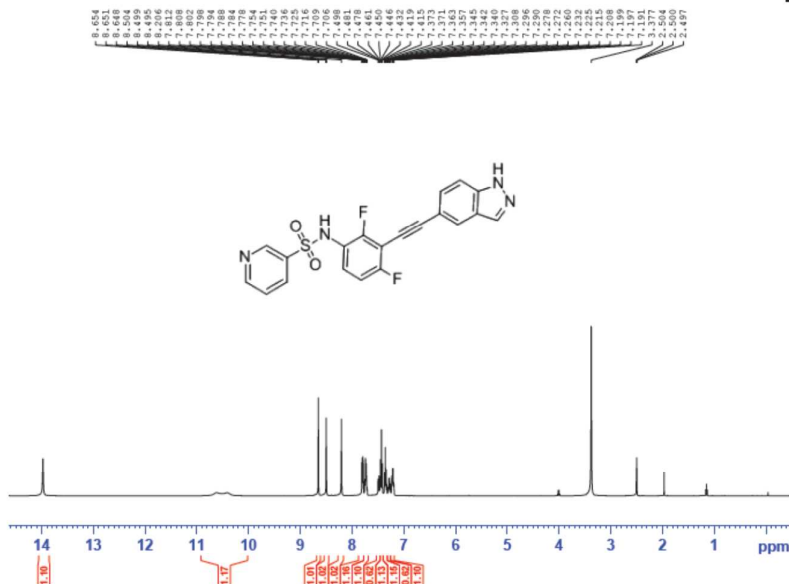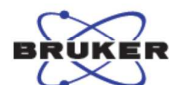

NAME 81461A  
 EXPNO 1  
 PROCNO 1  
 DATE\_ 20131115  
 TIME 1.31  
 INSTRUM spect  
 PROBRD 5 mm F400 BB-  
 PULPROG zgpg30  
 TD 65536  
 SOLVENT dmso  
 NS 2  
 DS 16  
 SWH 10350.978 Hz  
 FIDRES 0.237632 Hz  
 AQ 3.1719923 sec  
 RG 328  
 DW 48.400 usec  
 DE 6.50 usec  
 TE 298.3 K  
 D1 1.0000000 sec  
 TDO

----- CHANNEL f1 -----  
 NUC1 1H  
 P1 14.00 usec  
 PL1 2.50 dB  
 PLW 13.0235081 W  
 SFO1 500.1330885 MHz  
 SF1 500.1330885 MHz  
 WTW 1276  
 ST 500.1330030 MHz  
 WDW EM  
 SSB 0  
 LB 0.30 Hz  
 GB 0  
 PC 1.00

814233CL

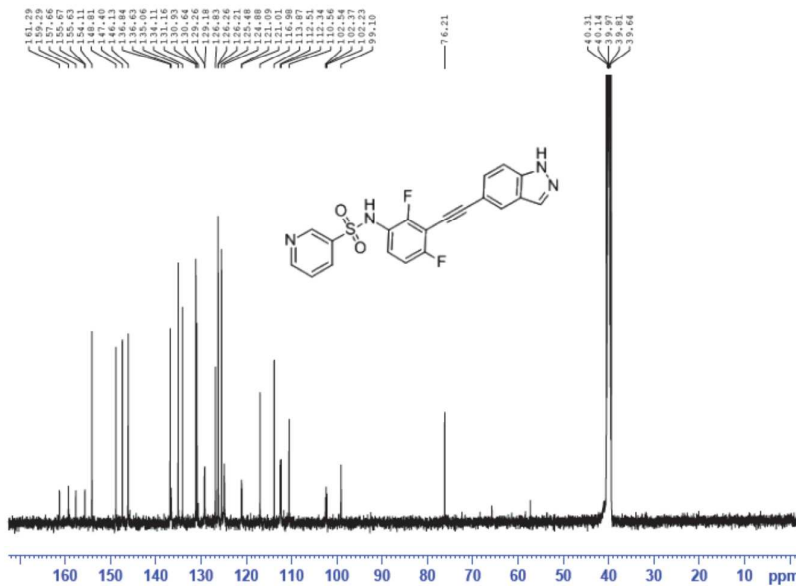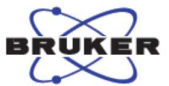

NAME 814233CL  
 EXPNO 1  
 PROCNO 1  
 DATE\_ 20141021  
 TIME 14.39  
 INSTRUM spect  
 PROBRD 5 mm F400 BB-  
 PULPROG zgpg30  
 TD 65536  
 SOLVENT dmso  
 NS 4  
 DS 10994  
 SWH 29761.904 Hz  
 FIDRES 0.454131 Hz  
 AQ 1.1032541 sec  
 RG 200  
 DW 14.600 usec  
 DE 6.50 usec  
 TE 299.2 K  
 D1 2.0000000 sec  
 D11 0.0300000 sec  
 TDO

----- CHANNEL f1 -----  
 NUC1 13C  
 P1 22.00 usec  
 PL1 2.50 dB  
 PLW 46.8962976 W  
 SFO1 125.7703643 MHz

----- CHANNEL f2 -----  
 NUC2 1H  
 P2 80.00 usec  
 PL2 2.50 dB  
 PL3 17.40 dB  
 PLW 13.0235081 W  
 SFO1 500.1330885 MHz  
 SF1 500.1330885 MHz  
 WTW 1276  
 ST 125.7577998 MHz  
 WDW EM  
 SSB 0  
 LB 1.00 Hz  
 GB 0  
 PC 1.40

198162

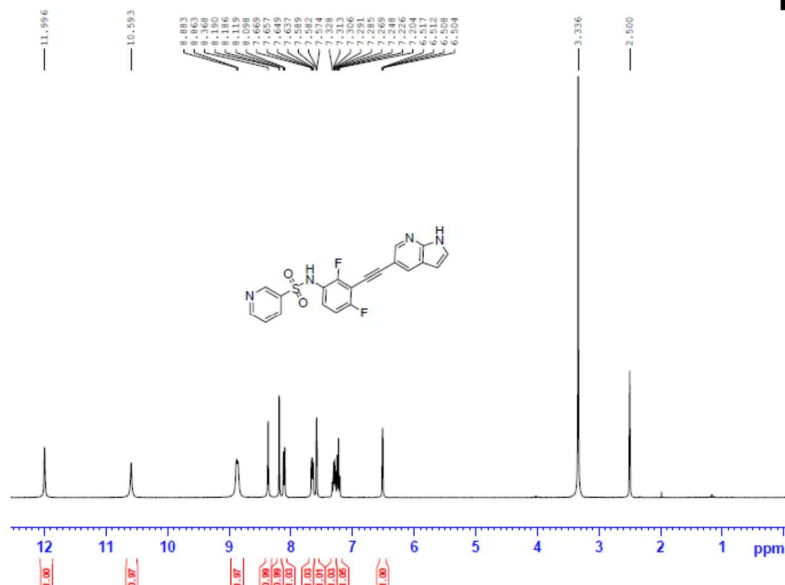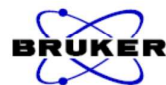

```

NAME          xaf
EXPNO         1981623
PROCNO       1
Date_         20130531
Time         17.48
INSTRUM      spect
PROBHD      5 mm PABBO BB-
PULPROG     zgpg30
TD           65536
SOLVENT     DMSO
DS           2
DE           16
SF           8279.146 Hz
FIDRES      0.120314 Hz
AQ           3.9584243 sec
RG           256
DM           60.400 usec
DE           6.50 usec
TE           299.8 K
DQ           1.0000000 sec
TDO          1

===== CHANNEL f1 =====
NUC1         1H
P1           12.58 usec
PL1          0.00 dB
PL12         10.87646866 W
SFO1         400.1324710 MHz
SI           32768
SF           400.1300017 MHz
WDW          EM
SSB          0
LB           0.30 Hz
GB           0
PC           1.00
    
```

198162

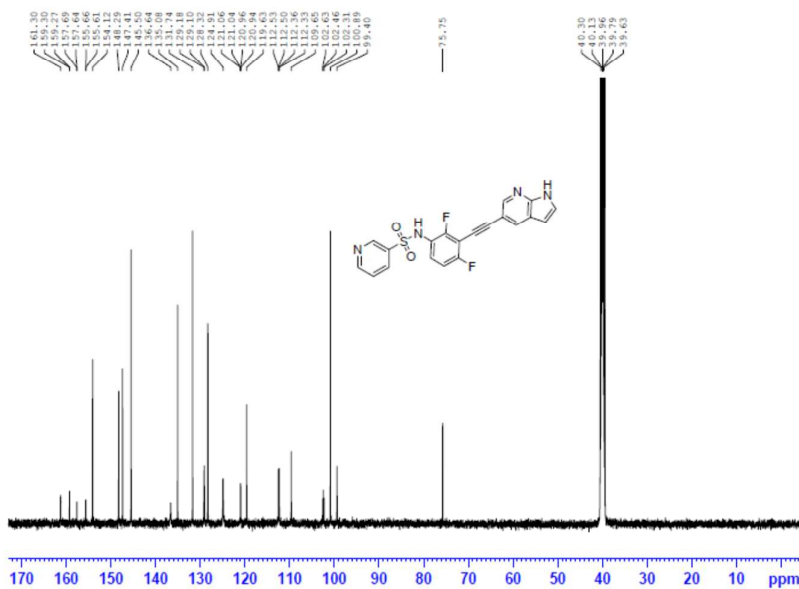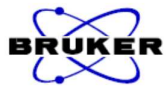

```

NAME          xaf
EXPNO         1981623
PROCNO       1
Date_         20130623
Time         7.43
INSTRUM      spect
PROBHD      5 mm BBOBO BB-
PULPROG     zgpg30
TD           65536
SOLVENT     DMSO
DS           2
DE           16
SF           23741.904 Hz
FIDRES      0.434311 Hz
AQ           1.1010243 sec
RG           256
DM           18.400 usec
DE           6.50 usec
TE           299.2 K
DQ           2.0000000 sec
TDO          1

===== CHANNEL f1 =====
NUC1         13C
P1           11.06 usec
PL1          0.00 dB
PL12         83.39463643 W
SFO1         125.7703643 MHz

===== CHANNEL f2 =====
CPDPRG2     waltz16
NUC2         1H
P2           80.00 usec
PL2          2.50 dB
PL12         17.40 dB
PL13         17.40 dB
PL14         17.40 dB
PL15         13.02303051 W
PL16         0.42143326 W
SFO2         400.1324710 MHz
SI           32768
SF           400.1300017 MHz
WDW          EM
SSB          0
LB           1.00 Hz
GB           0
PC           1.40
    
```

198167

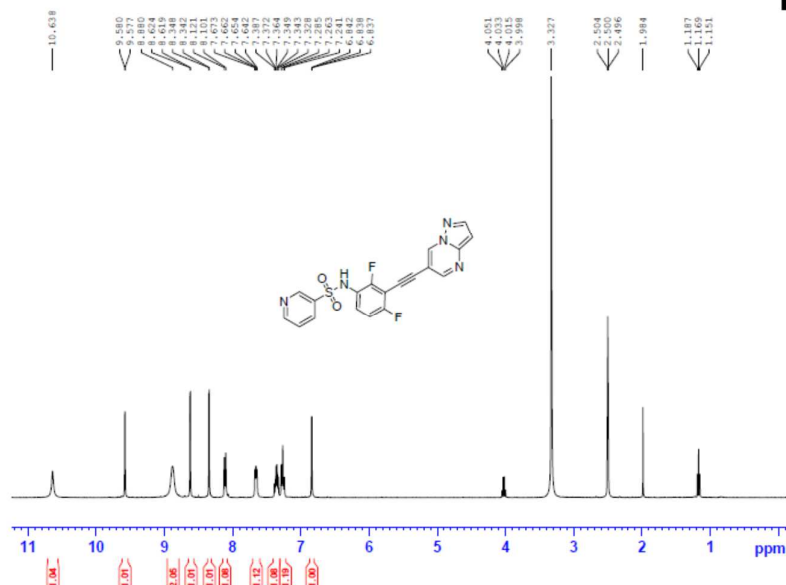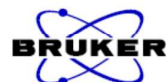

```

NAME          xaf
EXPNO         198167
PROCNO        1
Date_         20130531
Time          17.37
INSTRUM       spect
PROBHD        5 mm PABBO BB-
PULPROG       zgpg30
TD            65536
SOLVENT       DMSO
NS            16
DS            2
SWH           8279.146 Hz
FIDRES       0.125014 Hz
AQ           3.9584243 sec
RG            260
DM           60.400 usec
DE           6.50 usec
TE           299.8 K
DQ           1.0000000 sec
TDO           1
    
```

```

----- CHANNEL f1 -----
NUC1          1H
P1           12.58 usec
PC1          0.50 dB
PL1          10.8764686 Hz
SFO1         400.1324710 MHz
SI           32768
SF           400.1300018 MHz
WDW          EM
SSB          0
LB           0.30 Hz
GB           0
PC           1.00
    
```

198167C

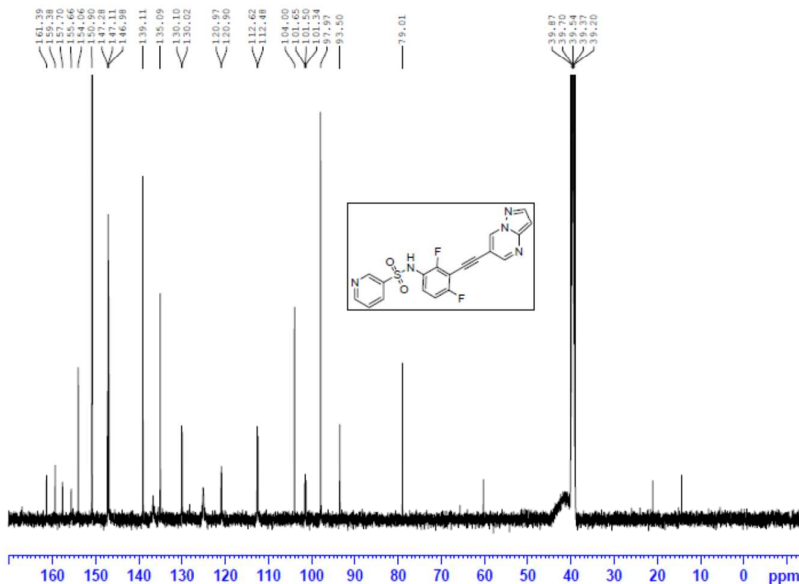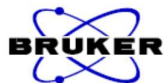

```

NAME          198167C
EXPNO         1
PROCNO        1
Date_         20141013
Time          2.34
INSTRUM       spect
PROBHD        5 mm BBOBO BB-
PULPROG       zgpg30
TD            65536
SOLVENT       DMSO
NS            3000
DS            2
SWH           23761.904 Hz
FIDRES       0.434331 Hz
AQ           1.1010263 sec
RG            200
DM           18.400 usec
DE           6.50 usec
TE           299.7 K
DQ           2.0000000 sec
TDO           0.0000000 sec
TDC           1
    
```

```

----- CHANNEL f1 -----
NUC1          13C
P1           12.58 usec
PC1          2.50 dB
PL1          46.8962476 Hz
SFO1         125.7703643 MHz
    
```

```

----- CHANNEL f2 -----
NAME          waltz16
EXPNO         1
PROCNO        1
Date_         20141013
Time          2.34
INSTRUM       spect
PROBHD        5 mm BBOBO BB-
PULPROG       zgpg30
TD            65536
SOLVENT       DMSO
NS            3000
DS            2
SWH           125.7577996 MHz
FIDRES       0.4343326 Hz
AQ           1.1010263 sec
RG            200
DM           18.400 usec
DE           6.50 usec
TE           299.7 K
DQ           2.0000000 sec
TDO           0.0000000 sec
TDC           1
    
```

Supporting Information

20130310d

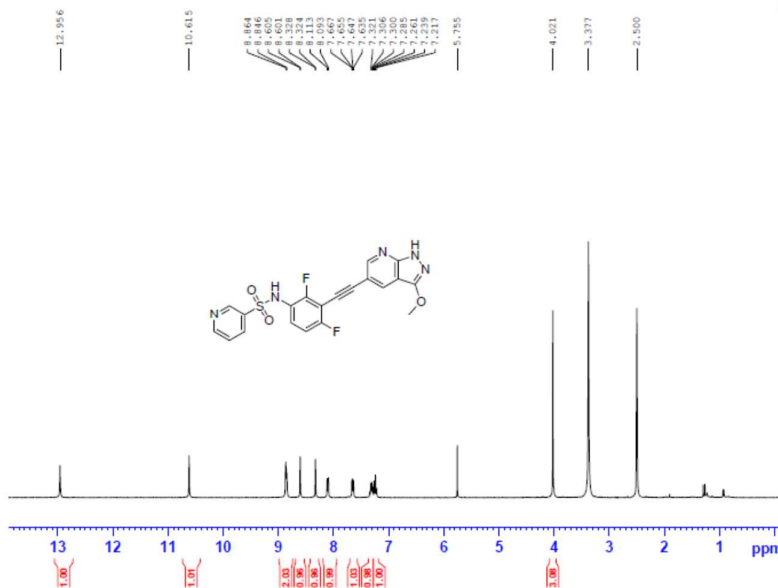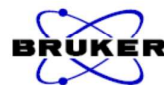

```
NAME          198089
EXPNO         1
PROCNO        1
Date_         20130311
Time          9.16
INSTRUM       spect
PROBHD        5 mm PABBO BB-
PULPROG       zgpg30
TD            65536
SOLVENT       DMSO
DS            2
DE            2
FIDRES        0.125014 Hz
AQ            3.9584243 sec
RG            456.1
DM            60.400 usec
DE            6.50 usec
TE            296.2 K
D1            1.0000000 sec
TDO           1
----- CHANNEL f1 -----
NUC1          13
P1            12.58 usec
PC            0.50 dB
PL1           10.8764686 dB
SFO1          400.1324710 MHz
SI            32768
SF            400.1300019 MHz
WDW           EM
SSB            0
LB            0.30 Hz
GB            0
PC            1.00
```

198089C

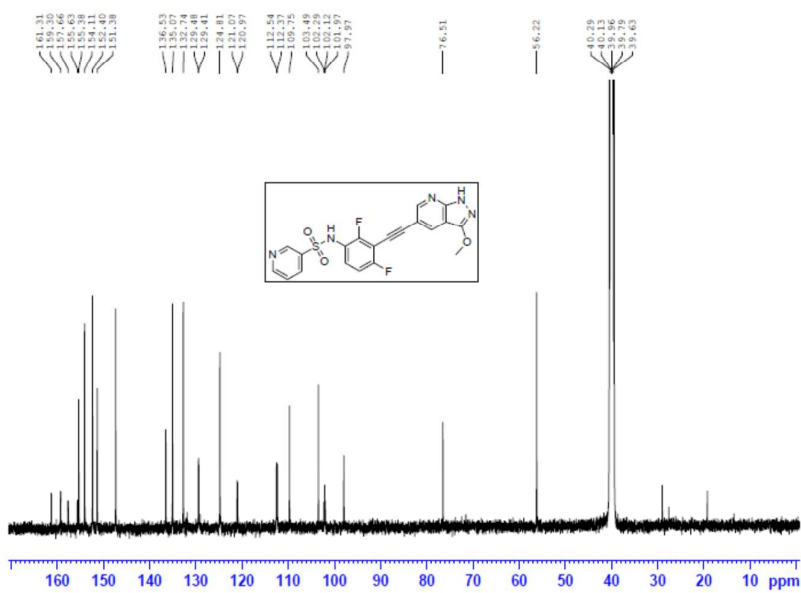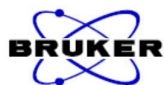

```
NAME          198089C
EXPNO         1
PROCNO        1
Date_         20141013
Time          7.59
INSTRUM       spect
PROBHD        5 mm PABBO BB-
PULPROG       zgpg30
TD            65536
SOLVENT       DMSO
DS            2
DE            2
FIDRES        0.23741304 Hz
AQ            1.1010264 sec
RG            200
DM            18.400 usec
DE            6.50 usec
TE            299.2 K
D1            2.0000000 sec
TDO           0.0000000 sec
----- CHANNEL f1 -----
NUC1          13C
P1            2.50 usec
PC            2.50 dB
PL1           46.8962476 dB
SFO1          125.7703643 MHz
----- CHANNEL f2 -----
CPDPRG2      waltz16
NUC2          13C
PCPD2         80.00 usec
PL2           2.50 dB
PL12          17.40 dB
PL13          17.40 dB
PL14          17.40 dB
PL15          17.40 dB
PL16          17.40 dB
PL17          17.40 dB
PL18          17.40 dB
PL19          17.40 dB
PL20          17.40 dB
PL21          17.40 dB
PL22          17.40 dB
PL23          17.40 dB
PL24          17.40 dB
PL25          17.40 dB
PL26          17.40 dB
PL27          17.40 dB
PL28          17.40 dB
PL29          17.40 dB
PL30          17.40 dB
PL31          17.40 dB
PL32          17.40 dB
PL33          17.40 dB
PL34          17.40 dB
PL35          17.40 dB
PL36          17.40 dB
PL37          17.40 dB
PL38          17.40 dB
PL39          17.40 dB
PL40          17.40 dB
PL41          17.40 dB
PL42          17.40 dB
PL43          17.40 dB
PL44          17.40 dB
PL45          17.40 dB
PL46          17.40 dB
PL47          17.40 dB
PL48          17.40 dB
PL49          17.40 dB
PL50          17.40 dB
PL51          17.40 dB
PL52          17.40 dB
PL53          17.40 dB
PL54          17.40 dB
PL55          17.40 dB
PL56          17.40 dB
PL57          17.40 dB
PL58          17.40 dB
PL59          17.40 dB
PL60          17.40 dB
PL61          17.40 dB
PL62          17.40 dB
PL63          17.40 dB
PL64          17.40 dB
PL65          17.40 dB
PL66          17.40 dB
PL67          17.40 dB
PL68          17.40 dB
PL69          17.40 dB
PL70          17.40 dB
PL71          17.40 dB
PL72          17.40 dB
PL73          17.40 dB
PL74          17.40 dB
PL75          17.40 dB
PL76          17.40 dB
PL77          17.40 dB
PL78          17.40 dB
PL79          17.40 dB
PL80          17.40 dB
PL81          17.40 dB
PL82          17.40 dB
PL83          17.40 dB
PL84          17.40 dB
PL85          17.40 dB
PL86          17.40 dB
PL87          17.40 dB
PL88          17.40 dB
PL89          17.40 dB
PL90          17.40 dB
PL91          17.40 dB
PL92          17.40 dB
PL93          17.40 dB
PL94          17.40 dB
PL95          17.40 dB
PL96          17.40 dB
PL97          17.40 dB
PL98          17.40 dB
PL99          17.40 dB
PL100         17.40 dB
```

Supporting Information

81424

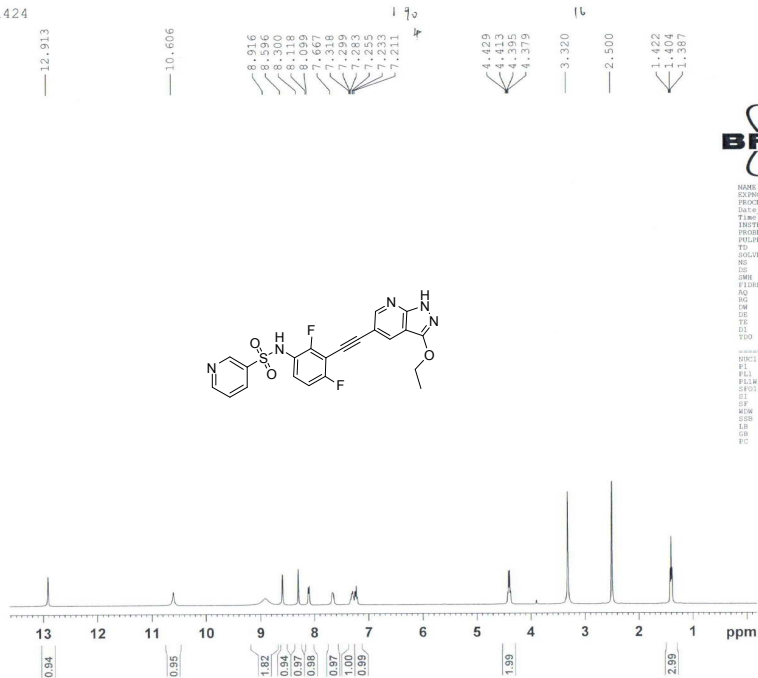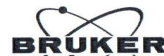

```

NAME      Oct24-2014
PROCNO    1
Date_     20141004
Time      11:11
INSTRUM   spect
PROBHD    5 mm EOL 13C-1
PULPROG   zgpg30
TD        65536
SOLVENT   DMSO
NS         8
DS         4
SWH        8979.146 Hz
FIDRES    0.126314 Hz
AQ         5.950451 sec
RG         312
DM         60.400 usec
DE         6.50 usec
TE         298.2 K
SE         1.0000000 sec
SI         1.0000000 sec
TSD       1
===== CHANNEL f1 =====
NUC1      13C
P1        12.00 usec
PL1       0.00 dB
PL12      16.8746680 dB
SFO1      400.132410 MHz
SFO12     127.49
SF        400.1300000 MHz
WDW       EM
SSB       0
LB        0.30 Hz
GB        0
PC        1.00
    
```

81425C

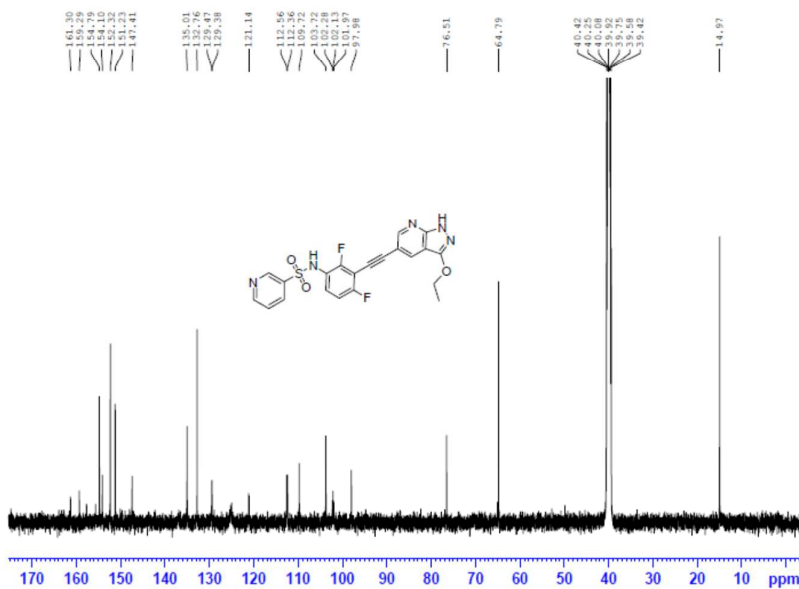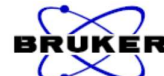

```

NAME      742
PROCNO    81425C
Date_     20131201
Time      11:49
INSTRUM   spect
PROBHD    5 mm BBO-13C
PULPROG   zgpg30
TD        65536
SOLVENT   DMSO
NS         8
DS         4
SWH        23761.904 Hz
FIDRES    0.434311 Hz
AQ         1.101026 sec
RG         20
DM         18.400 usec
DE         6.50 usec
TE         298.2 K
SE         1.0000000 sec
SI         0.0000000 sec
TSD       1
===== CHANNEL f1 =====
NUC1      13C
P1        12.00 usec
PL1       0.00 dB
PL12      46.8964766 dB
SFO1      125.7703643 MHz
===== CHANNEL f2 =====
NAME      13C
P1        80.00 usec
PL1       2.50 dB
PL12      17.40 dB
PL13      13.0230801 dB
PL14      0.4214326 dB
PL15      0.4214326 dB
SFO1      101.6261200 MHz
SFO2      500.1310000 MHz
SF        125.7703643 MHz
WDW       EM
SSB       0
LB        1.00 Hz
GB        0
PC        1.00
    
```

198157

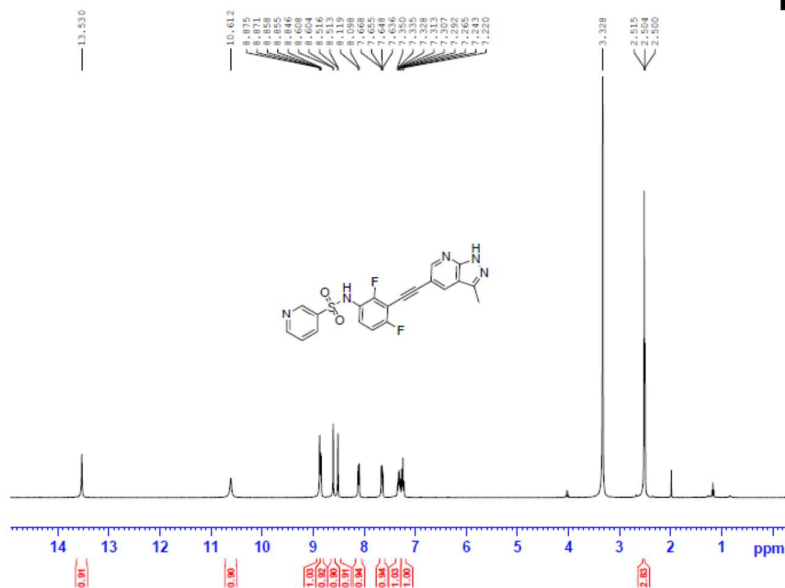

```

NAME          198157
EXPNO         1
PROCNO        1
Date_         20130531
Time          17.31
INSTRUM       spect
PROBHD        5 mm PABBO BB-
PULPROG       zgpg30
TD            65536
SOLVENT       DMSO
NS            16
DS            2
SWH           8279.146 Hz
FIDRES       0.125814 Hz
AQ           3.9584243 sec
RG            360
DM           60.400 usec
DE           0.50 usec
TE            299.9 K
TE           1.00000000 sec
TDG           1
    
```

----- CHANNEL f1 -----

```

NUC1          1H
P1            12.58 usec
PC            0.50 dB
PL1          10.87646866 W
SFO1         400.1324710 MHz
SI            32768
SF           400.1300010 MHz
WDW           RM
SSB           0
LB            0.30 Hz
GB            0
PC            1.00
    
```

LYJ198157

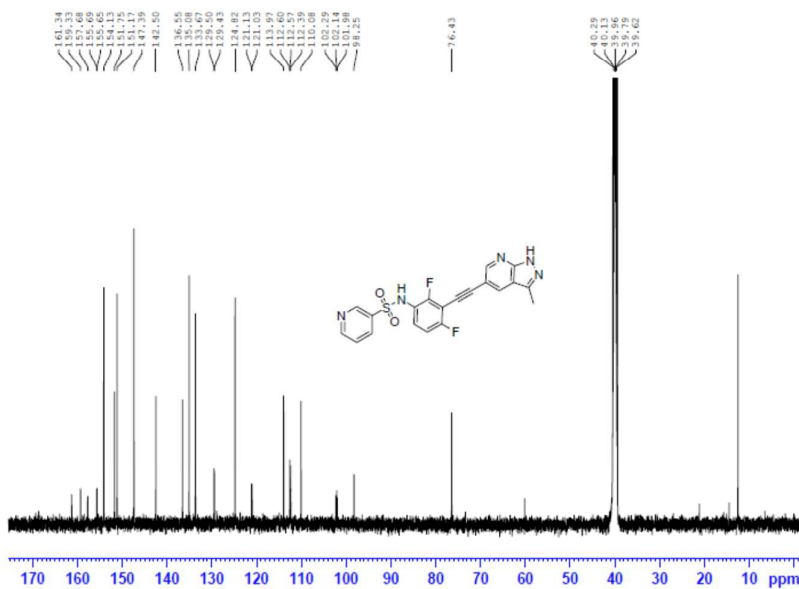

```

NAME          198157
EXPNO         1
PROCNO        1
Date_         20130603
Time          8.53
INSTRUM       spect
PROBHD        5 mm BBOBO BB-
PULPROG       zgpg30
TD            65536
SOLVENT       DMSO
NS            6500
DS            4
SWH           23761.904 Hz
FIDRES       0.434331 Hz
AQ           1.1010263 sec
RG            200
DM           18.800 usec
DE           6.50 usec
TE            297.7 K
TE           2.00000000 sec
TDG           0.00000000 sec
    
```

----- CHANNEL f1 -----

```

NUC1          13C
P1            11.00 usec
PC            0.00 dB
PL1          83.39463643 W
SFO1         125.7703643 MHz
    
```

----- CHANNEL f2 -----

```

CPDPRG2       waltz16
NUC2          1H
P2            80.00 usec
PC2           2.50 dB
PL2          17.40 dB
PL12         13.02330815 W
PL13         13.02330815 W
PL14         13.02330815 W
PL15         13.02330815 W
PL16         13.02330815 W
PL17         13.02330815 W
PL18         13.02330815 W
PL19         13.02330815 W
PL20         13.02330815 W
PL21         13.02330815 W
PL22         13.02330815 W
PL23         13.02330815 W
PL24         13.02330815 W
PL25         13.02330815 W
PL26         13.02330815 W
PL27         13.02330815 W
PL28         13.02330815 W
PL29         13.02330815 W
PL30         13.02330815 W
    
```

Supporting Information

198184

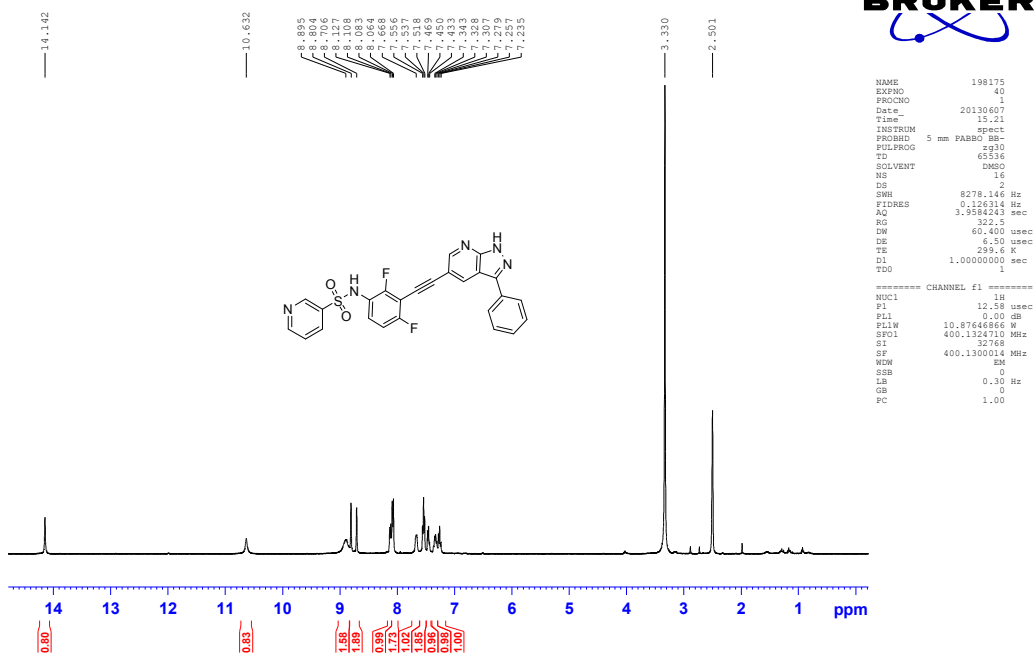

198175C

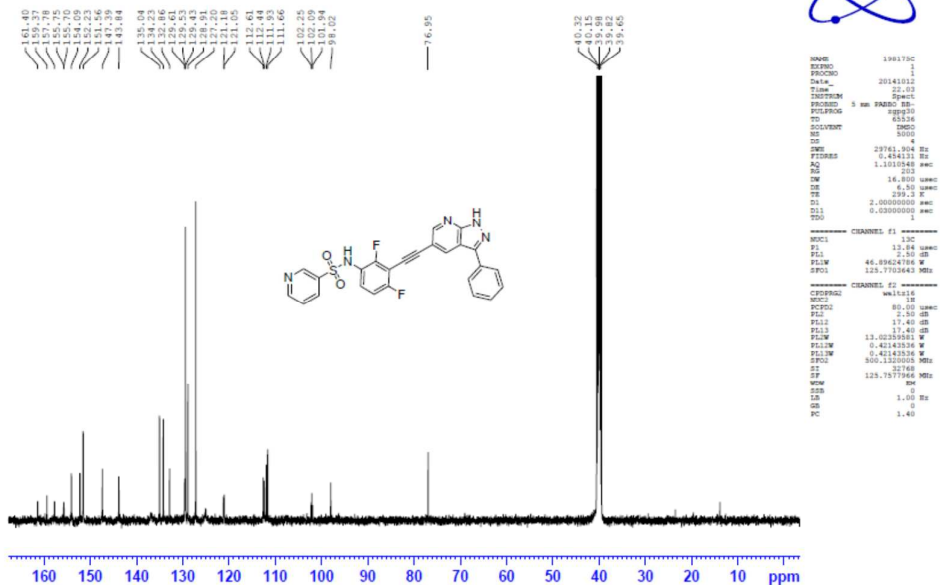

81519

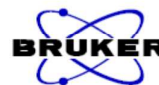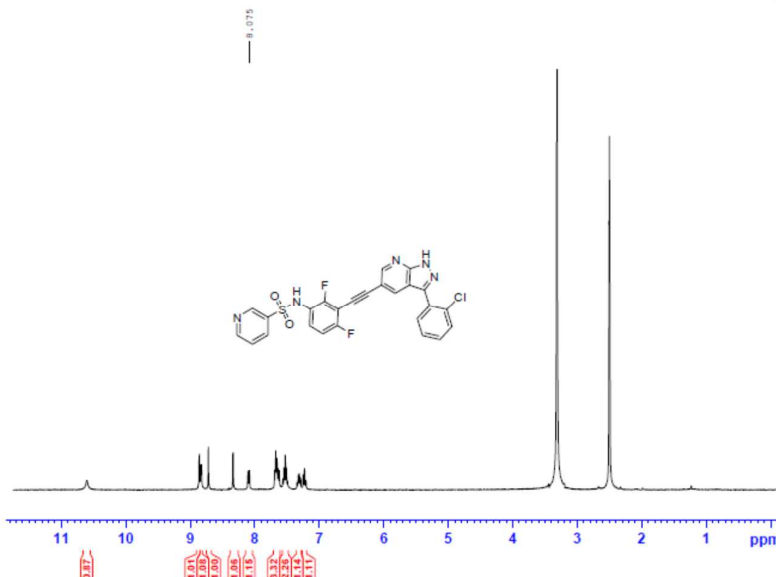

```

NAME          ref
EXPNO         81420
PROCNO        1
Date_         20140604
Time          17.23
INSTRUM       spect
PROBHD        5 mm QNP 13C-1
PULPROG       zgpg30
TD            65536
SOLVENT       CDCl3
NS            2
DS            4
SWH           8278.146 Hz
FIDRES        0.128314 Hz
AQ            3.9584243 sec
RG            512
DM            60.400 usec
DE            6.50 usec
TE            300.3 K
D1            1.00000000 sec
TDO           1

===== CHANNEL f1 =====
NUC1          13C
P1            12.58 usec
PL1           0.50 dB
PL12          19.8764086 dB
SFO1          400.1324710 MHz
SI            32768
WF           400.1319100 MHz
WDW           EM
SSB           0
LB            0.30 Hz
GB            0
PC            1.00
    
```

814233CL

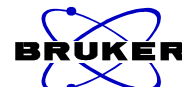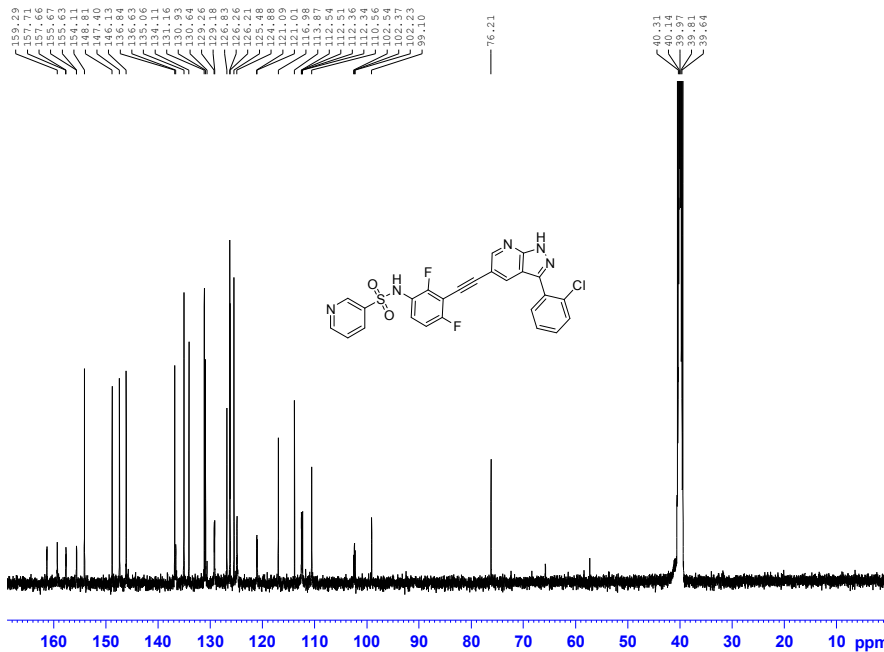

```

NAME          814233CL
EXPNO         1
PROCNO        1
Date_         20141021
Time          14.39
INSTRUM       spect
PROBHD        5 mm PABBO BB-
PULPROG       zgpg30
TD            65536
SOLVENT       DMSO
NS            4
DS            4
SWH           29761.904 Hz
FIDRES        0.454131 Hz
AQ            1.1010268 sec
RG            203
DM            16.600 usec
DE            6.50 usec
TE            295.3 K
D1            2.00000000 sec
D11           0.03000000 sec
TDO           1

===== CHANNEL f1 =====
NUC1          13C
P1            13.84 usec
PL1           2.50 dB
PL12          46.89624786 dB
SFO1          125.7703643 MHz

===== CHANNEL f2 =====
CPOPC2       waltz16
NUC2          1H
PCPO2        80.00 usec
PL2           2.50 dB
PL12          17.40 dB
PL13          17.40 dB
PL14          17.40 dB
PL15          17.40 dB
PL16          17.40 dB
PL17          17.40 dB
PL18          17.40 dB
PL19          17.40 dB
PL20          17.40 dB
PL21          17.40 dB
PL22          17.40 dB
PL23          17.40 dB
PL24          17.40 dB
PL25          17.40 dB
PL26          17.40 dB
PL27          17.40 dB
PL28          17.40 dB
PL29          17.40 dB
PL30          17.40 dB
PL31          17.40 dB
PL32          17.40 dB
PL33          17.40 dB
PL34          17.40 dB
PL35          17.40 dB
PL36          17.40 dB
PL37          17.40 dB
PL38          17.40 dB
PL39          17.40 dB
PL40          17.40 dB
PL41          17.40 dB
PL42          17.40 dB
PL43          17.40 dB
PL44          17.40 dB
PL45          17.40 dB
PL46          17.40 dB
PL47          17.40 dB
PL48          17.40 dB
PL49          17.40 dB
PL50          17.40 dB
PL51          17.40 dB
PL52          17.40 dB
PL53          17.40 dB
PL54          17.40 dB
PL55          17.40 dB
PL56          17.40 dB
PL57          17.40 dB
PL58          17.40 dB
PL59          17.40 dB
PL60          17.40 dB
PL61          17.40 dB
PL62          17.40 dB
PL63          17.40 dB
PL64          17.40 dB
PL65          17.40 dB
PL66          17.40 dB
PL67          17.40 dB
PL68          17.40 dB
PL69          17.40 dB
PL70          17.40 dB
PL71          17.40 dB
PL72          17.40 dB
PL73          17.40 dB
PL74          17.40 dB
PL75          17.40 dB
PL76          17.40 dB
PL77          17.40 dB
PL78          17.40 dB
PL79          17.40 dB
PL80          17.40 dB
PL81          17.40 dB
PL82          17.40 dB
PL83          17.40 dB
PL84          17.40 dB
PL85          17.40 dB
PL86          17.40 dB
PL87          17.40 dB
PL88          17.40 dB
PL89          17.40 dB
PL90          17.40 dB
PL91          17.40 dB
PL92          17.40 dB
PL93          17.40 dB
PL94          17.40 dB
PL95          17.40 dB
PL96          17.40 dB
PL97          17.40 dB
PL98          17.40 dB
PL99          17.40 dB
PL100         17.40 dB
    
```





Supporting Information

198197

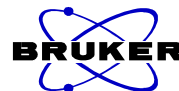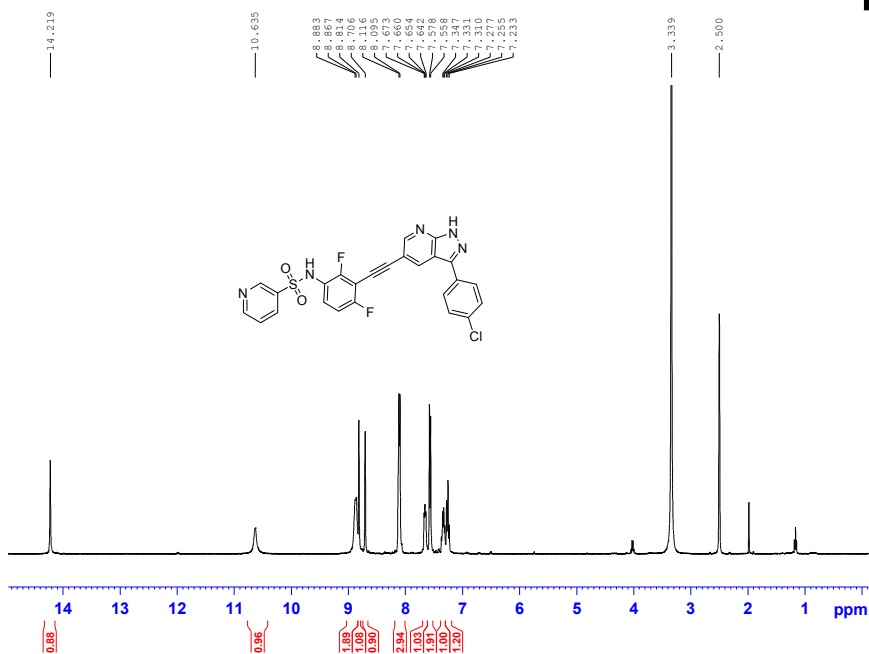

```

NAME          198197
EXPNO         13
PROCNO        1
Date_         20110722
Time_         10.26
INSTRUM       spect
PROBHD        5 mm PABBO BB-
PULPROG       zg30
TD            65536
SOLVENT       DMSO
NS            32
DS            2
SWH           8278.146 Hz
FIDRES       0.126334 Hz
AQ           3.9584243 sec
RG            256
RW           60.400 usec
DE           6.50 usec
TE           299.1 K
D1           1.0000000 sec
TDO           1
===== CHANNEL f1 =====
NUC1          1H
P1            12.58 usec
PL1           0.00 dB
PL12          10.87648666 W
SFO1          400.1324710 MHz
SI            2768
SF            400.1300013 MHz
WDW           EM
SSB           0
LB            0.30 Hz
GB            0
PC            1.00
    
```

198197

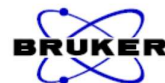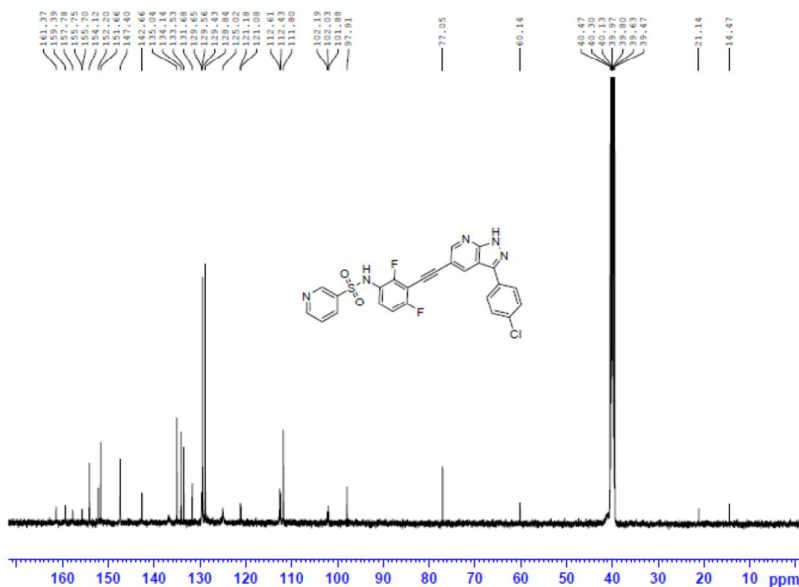

```

NAME          198197
EXPNO         13
PROCNO        1
Date_         20110722
Time_         10.26
INSTRUM       spect
PROBHD        5 mm PABBO BB-
PULPROG       zgpg30
TD            65536
SOLVENT       DMSO
NS            32
DS            2
SWH           20761.904 Hz
FIDRES       0.2602024 Hz
AQ           0.5503524 sec
RG            256
RW           14.900 usec
DE           6.50 usec
TE           299.1 K
D1           2.0000000 sec
D11          0.0300000 sec
TDO           1
===== CHANNEL f1 =====
NUC1          13C
P1            11.46 usec
PL1           0.00 dB
PL12          83.39483043 W
SFO1          125.7703643 MHz
===== CHANNEL f2 =====
CPDPRG2       waltz16
NUC2          1H
PCPD2         80.00 usec
PL2           2.50 dB
PL12          17.40 dB
PL13          0.00 dB
PL14          13.02390881 W
SFO2          0.421430316 MHz
SFO3          0.421430316 MHz
SI            2768
SF            125.7679666 MHz
WDW           EM
SSB           0
LB            1.00 Hz
GB            0
PC            1.40
    
```

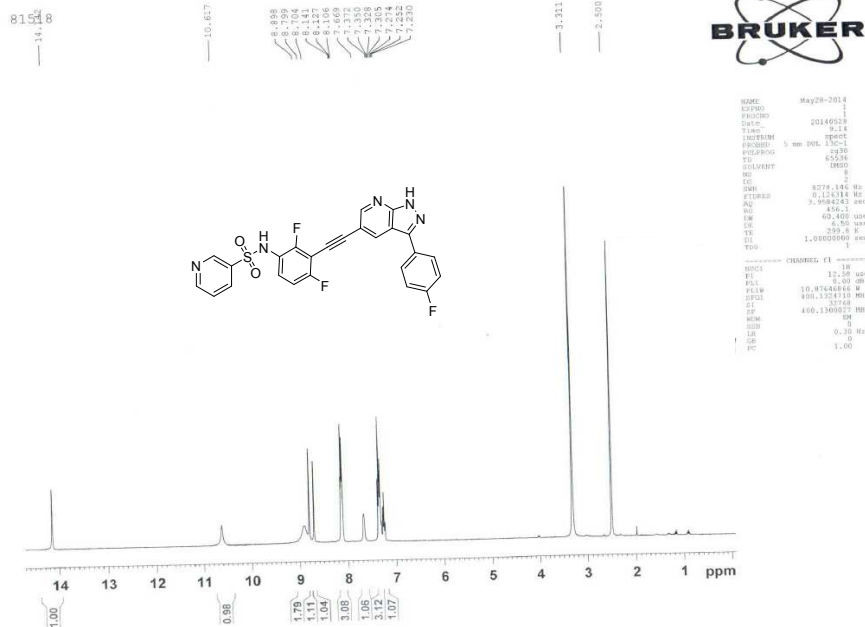

81518

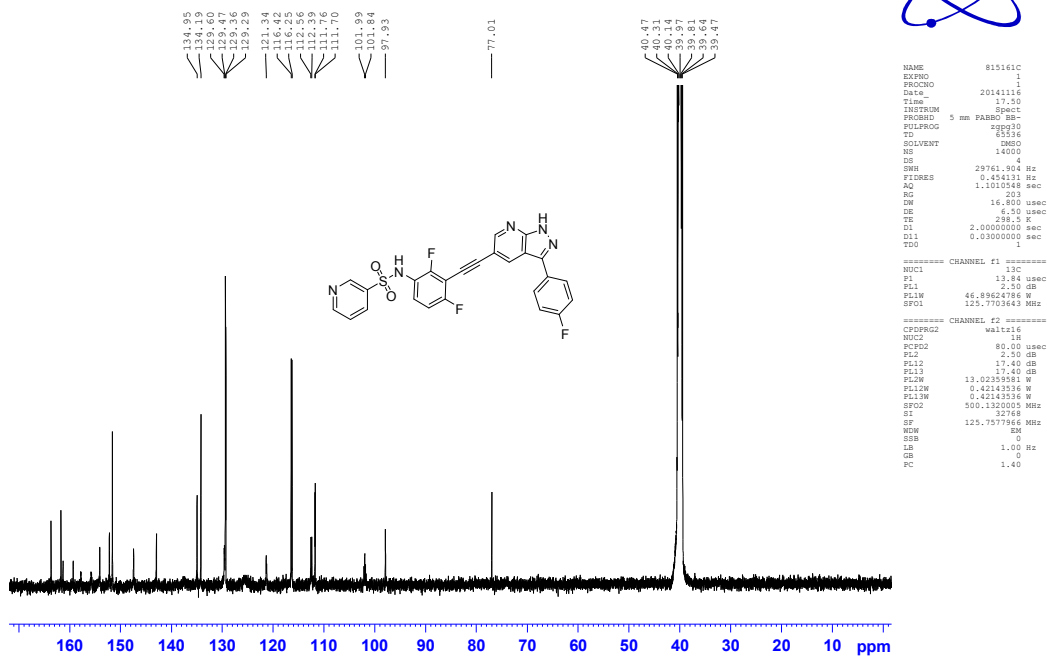

Supporting Information

81516H

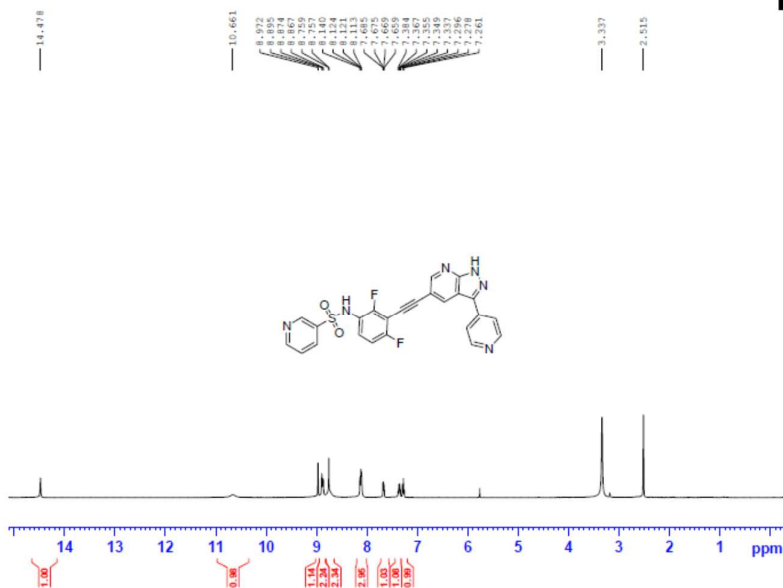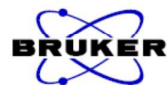

```

NAME          xyz
EXPNO        815161
PROCNO       1
Date_        20140612
Time         4.03
INSTRUM      spect
PROBHD      5 mm F400 BBO
PULPROG      zgpg30
TD           65536
SOLVENT      DMSO
NS           16
DS           2
SWH          10330.578 Hz
FIDRES      0.157618 Hz
AQ           3.1719923 ssec
RG           200
DM           48.400 usec
DE           6.50 usec
TE           297.2 K
DQ           1.0000000 ssec
TDO           1

----- CHANNEL f1 -----
NUC1         13C
P1           14.00 usec
PL1          2.50 dB
PL12         13.02359581 W
SFO1         500.1330885 MHz
SI           32768
SF           500.1300000 MHz
WDW          EM
SSB          0
LB           0.30 Hz
GB           0
PC           1.00
    
```

81516C

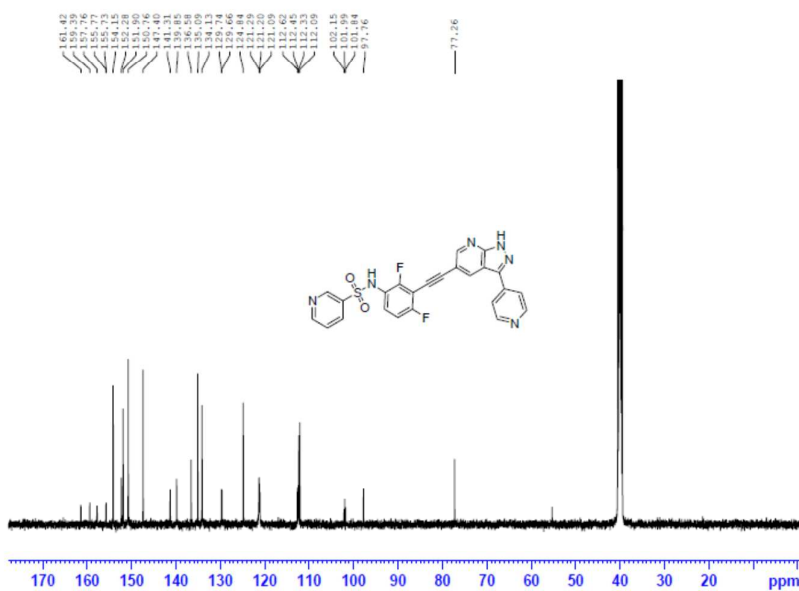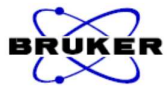

```

NAME          xyz
EXPNO        815162
PROCNO       1
Date_        20140612
Time         7.33
INSTRUM      spect
PROBHD      5 mm F400 BBO
PULPROG      zgpg30
TD           65536
SOLVENT      DMSO
NS           5000
DS           4
SWH          23761.904 Hz
FIDRES      0.434311 Hz
AQ           1.1010245 ssec
RG           200
DM           18.400 usec
DE           6.50 usec
TE           297.2 K
DQ           2.0000000 ssec
TDO           0.0000000 ssec

----- CHANNEL f1 -----
NUC1         13C
P1           12.00 usec
PL1          2.50 dB
PL12         46.8942498 W
SFO1         125.7703643 MHz

----- CHANNEL f2 -----
NAME         xyz
EXPNO        815163
PROCNO       1
Date_        20140612
Time         7.33
INSTRUM      spect
PROBHD      5 mm F400 BBO
PULPROG      zgpg30
TD           65536
SOLVENT      DMSO
NS           5000
DS           4
SWH          23761.904 Hz
FIDRES      0.434311 Hz
AQ           1.1010245 ssec
RG           200
DM           18.400 usec
DE           6.50 usec
TE           297.2 K
DQ           2.0000000 ssec
TDO           0.0000000 ssec
    
```
